# 1 **Visual psychophysics and limits of visual discrimination performance in freely** 2 **behaving mice**

3  
4 **Wen-Kai You<sup>1,2</sup> and Shreesh P. Mysore<sup>1,2\*</sup>**

5 <sup>1</sup>Department of Psychological and Brain Sciences, Johns Hopkins University

6 <sup>2</sup>The Solomon H. Snyder Department of Neuroscience, Johns Hopkins University

7 \*Corresponding author: [shreesh.mysore@jhu.edu](mailto:shreesh.mysore@jhu.edu)

## 8 9 **ABSTRACT**

10  
11 **Mice are being used increasingly commonly to study visually guided behaviors. To help frame the**  
12 **design of visual tasks in mice, we explored limits of mouse visual behavior using a touchscreen-**  
13 **based 2AFC orientation discrimination task in unrestrained animals. We found that mice were able**  
14 **to discriminate targets as small as 25°, as brief as 100 ms, and with an ‘impulsivity index’ of 0.6.**  
15 **They were able to perform well a rudimentary visual search task, exhibiting classic psychometric**  
16 **curves to the relative contrast between target and foil. Using a combination of conditional accuracy**  
17 **analysis and drift diffusion modeling, we estimated the time for sensory encoding in mice as 300 ms,**  
18 **and the duration of their visual short-term memory as 1700 ms. Our results reveal surprising**  
19 **parallels between aspects of mouse and human visual behavior, and suggest that visual perceptual**  
20 **abilities of mice may be underappreciated.**

## 21 22 23 **INTRODUCTION**

24  
25 Recent years have seen a rise in the use of the laboratory mouse for the study of the visual system [1-3] and  
26 visually guided behaviors [4-10]. This has been driven partly by the wealth of modern, genetics-based tools  
27 available for neural interrogation in mice. Nonetheless, because of their lower visual acuity than primates [1,  
28 10-12]), as well as their perceived impulsivity [13, 14], there have been concerns that mice may not be  
29 ideally suited to study higher visual cognitive function [1]. These concerns are now being somewhat  
30 alleviated, for instance, by the successful demonstration of the study of primate-like visuospatial selective  
31 attention in both head-fixed [15] as well as freely behaving mice [16]. In light of these developments, an  
32 understanding of the limits of mouse visual performance is imperative for the appropriate design of visual  
33 tasks in mice, but represents a gap in our knowledge. Whereas psychophysical curves to stimulus contrast  
34 as well as spatial frequency have been obtained in mice through a variety of methods ([8-12]), an in-depth  
35 exploration of the operating range of task features (presence and properties of competing foil), other  
36 stimulus features (size, duration, etc.), as well as of key perceptual processes (duration of visual short term  
37 memory, window of sensory integration, etc) underlying mouse visual behavior is lacking. Because  
38 stimulus feature discrimination is a core module in studies of visually guided behavior, here, we explored  
39 the limits of mouse visual performance using a 2AFC orientation discrimination task as the basis.  
40 Considering the highly exploratory nature of the native behavior of mice, we examined visual performance  
41 limits in unrestrained, freely behaving mice, and did so using a touchscreen-based set up [16, 17].

42  
43 In a series of experiments, we examined the effect of stimulus size, contrast, duration, and delay, as well as  
44 the presence, relative information content and relative contrast of a foil, on mouse performance. We used  
45 standard behavioral metrics of response accuracy, reaction time (RT), perceptual sensitivity ( $d'$ ) and  
46 decision criterion, to quantify aspects of mouse performance. Our results not only revealed that mice  
47 performed successfully in these experiments despite being challenged progressively more with different  
48 manipulations, but also identified limiting values in the stimulus/task features for successful performance.  
49 Moreover, by applying the conditional accuracy analysis [18-21], we identified two distinct stages in the  
50 time-course of their behavior within a trial – a temporally limited sensory encoding stage [22-26] in which

51 response speed and response accuracy exhibit a tradeoff, and a second stage, impacted by visual short-term  
 52 memory (VSTM; [27-35]), in which they do not. Combining these results with those from drift diffusion  
 53 modeling of RT distributions allowed us to estimate the sensory encoding time of mice, the length of their  
 54 visual short-term memory, the shortest visual stimulus that is informative, and the longest stimulus beyond  
 55 which no additional benefit in response accuracy is seen. Finally, by varying stimulus onset delay, we  
 56 quantitatively estimated impulsivity of mice via an ‘impulsivity index’. Our results provide a window into  
 57 the operational range of key parameters in mouse visual discrimination behavior, and can serve as a  
 58 quantitative behavioral guide for future studies exploring the neural circuit basis of visual cognition in mice.

59  
 60 **RESULTS**

61  
 62 All the behavioral tasks in this study involved a touchscreen-based setup described previously [16, 17]  
 63 (Methods). Briefly, freely behaving mice were placed in a plexiglass tube within a soundproof operant  
 64 chamber equipped with a touch-sensitive screen, and a reward well located at the opposite face of the box  
 65 from the touchscreen (Fig. 1A, S1A). A plexiglass sheet, with three holes corresponding to the locations  
 66 at which the mouse was allowed to interact with the touchscreen by a nose-touch, was placed in front of  
 67 it. All trials began with a nose-touch on a bright zeroing-cross presented within the lower central hole.  
 68 Immediately following nose-touch, visual stimuli (bright objects on a dark background) were presented  
 69 on the screen. The lateralized upper holes served as response ports for the animals to report their  
 70 behavioral choice (left vs. right nose-touch). Behavioral data were collected from daily sessions that  
 71 lasted 30 minutes for each mouse.  
 72

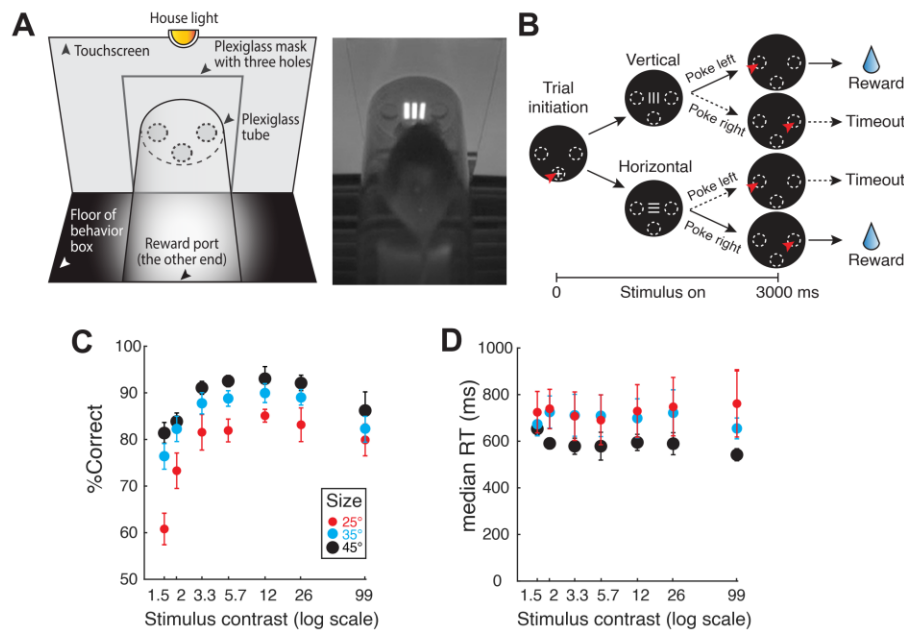

73  
 74  
 75 **Figure 1. Stimulus contrast and size modulate orientation discrimination performance in freely behaving**  
 76 **mice.** (A) Left: Schematic of touchscreen-based experimental setup showing key components. Right: Snapshot of  
 77 freely behaving mouse facing a visual stimulus on the touchscreen. (B) Schematic of 2-AFC task design. Black  
 78 discs: Screenshots of touchscreen with visual stimuli; dashed ovals: locations of holes through which mice can  
 79 interact with touchscreen; white ‘+’: zeroing cross presented within central response hole at start of each trial; red  
 80 arrowhead: nose-touch by mouse. Shown also are vertical or horizontal grating stimuli, and reinforcement  
 81 (water)/punishment (timeout) schedule. Bottom: Trial timeline. 0 ms corresponds to the instant at which the mouse  
 82 touches the zeroing cross (trial initiation). Immediately following this, the target grating was presented and stayed  
 83 on for 3s, or until the mouse responded, whichever came first. Vertical and horizontal targets were interleaved  
 84 randomly. (C) Psychometric plots of discrimination accuracy against stimulus contrast (luminance<sub>Bright</sub> /

85 luminance<sub>Dark</sub>; log scale; Methods). Different colors correspond to different target sizes. Data: mean  $\pm$  s.e.m; n= 8  
86 mice. 2-way ANOVA,  $p < 0.001$  (contrast),  $p < 0.001$  (size),  $p = 0.498$  (interaction). (D) Plot of median reaction time  
87 (RT) against stimulus contrast (log scale). 2-way ANOVA,  $p = 0.99$  (contrast),  $p = 0.004$  (size),  $p = 1$  (interaction).  
88 See also Fig. S1.

89  
90 **Stimulus contrast and size modulate mouse performance in discriminating grating orientation.**

91 To explore the limits of visual discrimination of mice, we started by examining their performance on a  
92 single stimulus orientation discrimination task, in which we systematically varied the contrasts and sizes  
93 of the stimulus. Upon trial initiation, a grating stimulus (“target”), whose orientation could be either  
94 vertical or horizontal, was presented at the center of the screen for up to 3 seconds (Fig.1B; Methods).  
95 Mice were trained to respond to the orientation of the target with an appropriate nose-touch (vertical  $\rightarrow$   
96 left and horizontal  $\rightarrow$  right). Mice were allowed to respond at any time during stimulus presentation, with  
97 stimulus presentation terminating automatically upon response. A correct response resulted in a beep (1s,  
98 600Hz), followed by reward delivery (10uL water) at the port located at the opposite end of the chamber  
99 from the touchscreen. An incorrect response resulted in a 5-second pause, during which the house light  
100 was illuminated, following which the central cross became available once again for the mouse to initiate  
101 the next trial (Methods).

102  
103 Three different sizes of the target were tested: 25° (60 x 60 pixels<sup>2</sup>), 35° (84 x 84 pixels<sup>2</sup>), and 45° (108 x  
104 108 pixels<sup>2</sup>), and for each size, seven different contrasts were tested (luminance<sub>bright</sub>/luminance<sub>dark</sub> = 1.5, 2,  
105 3.3, 5.7, 12, 26, 99; Methods). The spatial frequency of the grating was chosen to be 0.1 cycles/degree (24  
106 pixels/cycle; for this task as well as all subsequent tasks), based on published reports that this value is  
107 within the range of spatial frequencies at which mice have the best visual contrast sensitivity [10, 11].

108  
109 We found that both the stimulus size and contrast significantly modulated discrimination performance in  
110 mice (Fig. 1C, 2-way ANOVA, main effect of size,  $p < 0.001$ ; main effect of contrast,  $p < 0.001$ ; Fig.  
111 S1CD). Mice discriminated the orientation better, in general, when the target was of higher contrast, with  
112 performance plateauing at a contrast of 12 (“best” contrast) for all target sizes. This was reflected both in  
113 discrimination accuracy (Fig. 1C) as well as in perceptual sensitivity (Fig. S1BC; Methods); decision  
114 criterion was largely unaffected by stimulus contrast (Fig. S1D). Higher stimulus contrasts (than 12) did  
115 not provide an additional benefit for perceptual judgements (Fig. 1C and S1C). Notably, even at the  
116 lowest contrast tested (1.5), mice were able to discriminate target orientation better than chance (50%;  
117 Fig. 1C; red dot at the left lower corner,  $p = 0.039$ , Wilcoxon signed rank test)

118  
119 Along similar lines, mice discriminated target orientation better when the stimulus was larger, with  
120 discrimination accuracy plateauing at 93% correct (Fig. 1C) and perceptual discriminability at 3.37 (Fig.  
121 S1C) for a stimulus size of 45° (and best contrast); larger stimulus sizes did not provide additional  
122 benefits for perceptual judgements (Fig. S1F-H). There was no significant effect of target size on  
123 response criterion (Fig. S1D). Notably, for the smallest target size that we tested (25°), mice were still  
124 able to discriminate the orientation with  $> 80\%$  accuracy for most of the stimulus contrasts ( $\geq 3.3$ ; Fig. 1C,  
125 red data).

126  
127 Analysis of reaction times (RTs) revealed a significant effect of stimulus size - mice responded faster  
128 when the stimulus was larger, but there were no significant changes in median RT (surprisingly) with  
129 change in stimulus contrast (Fig.1D, two-way ANOVA; main effect of size,  $p = 0.004$ ; main effect of  
130 contrast,  $p = 0.998$ ; interaction,  $p = 1$ ).

131  
132 Together, these results revealed a systematic effect of target contrast as well as size on discrimination  
133 accuracy, driven primarily by their effect on perceptual sensitivity rather than response criterion. Median  
134 RT negatively correlated with target size (Fig. S1G, Pearson’s  $\rho = 0.83$ ,  $p = 0.08$ ), but exhibited no  
135 significant effect with respect to target contrast.

136  
137  
138  
139  
140  
141  
142  
143  
144  
145  
146  
147

### Stimulus size and contrast modulate the conditional accuracy function (CAF).

To investigate in greater detail the performance of mice on this task, we made use of the natural variability of the RT data and adopted the ‘conditional accuracy analysis’ [18-21]; Methods). This involves examining the dependence of mouse discrimination accuracy on RT, producing a conditional accuracy function (CAF; Fig. 2A). This analysis links the two commonly used metrics of behavioral performance, namely, accuracy and reaction time, with the overall accuracy being the dot product of the CAF with the RT distribution. As a result, application of the conditional analysis can help decompose observed change in response accuracy following any experimental manipulation, into changes in the CAF, in RTD, or both.

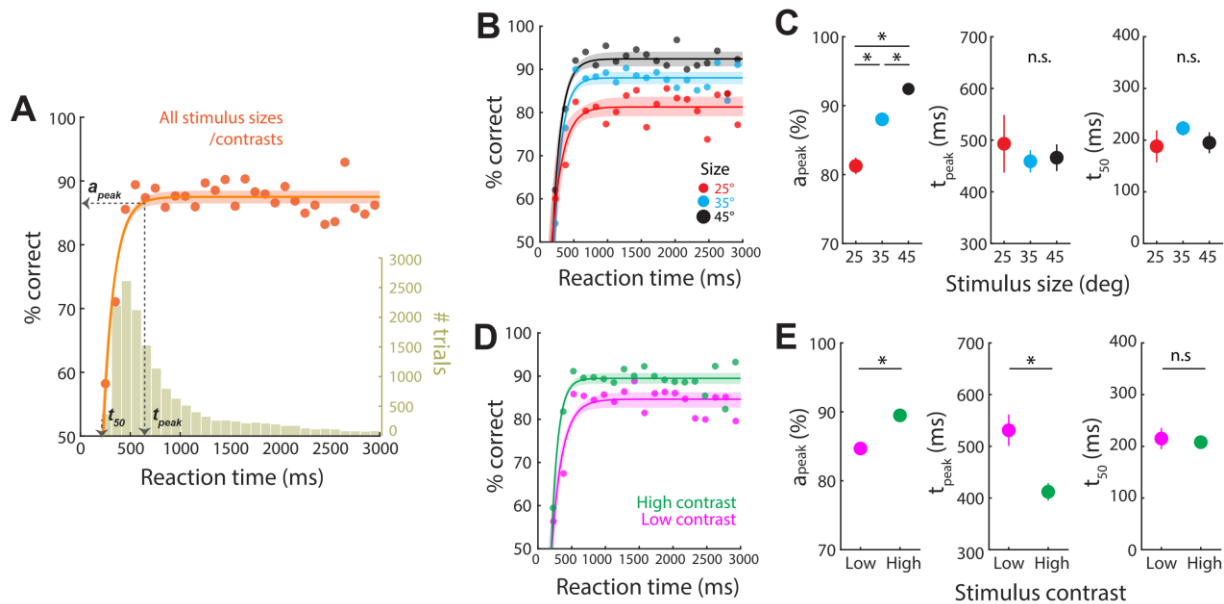

148  
149

### Figure 2. Stimulus contrast and size modulate the sensory encoding regime of the conditional accuracy function.

(A) Plot of accuracy as a function of RT bins (conditional accuracy) using same dataset as Fig. 1. Orange dots: Data pooled across all stimulus sizes and contrasts,  $n=8$  mice; RT bin size = 100 ms. Orange curve: Conditional accuracy function, CAF (best-fit rising asymptotic function; Methods); light orange shading: 95% CI of the fit (Methods). Indicated are three key parameters ( $a_{peak}$ ,  $t_{peak}$ , and  $t_{50}$ ) describing the sensory encoding stage of the CAF - the initial period during which accuracy improves for longer RT values, exhibiting a tradeoff between speed and accuracy (see text; Methods). Peak accuracy ( $a_{peak}$ ): mean  $\pm$  s.d. =  $87.5 \pm 0.5\%$ ; time to reach peak accuracy ( $t_{peak}$ ):  $462 \pm 13$  ms; time at which accuracy just exceeds 50% ( $t_{50}$ ):  $236 \pm 10$  ms. Gold histogram: RT distribution (y-axis on the right). The overall response accuracy for a particular stimulus condition is the dot product of the CAF and the RT distribution. (B) CAFs for targets of various sizes (black: 45°; blue: 35°; red: 25°); conventions as in A. (C) Plots of key CAF parameters for different target sizes. Left panel:  $a_{peak}$ ; middle panel:  $t_{peak}$ ; right panel:  $t_{50}$ . Data show mean  $\pm$  s.t.d of distribution of bootstrapped estimates (Methods). ‘\*’ (‘n.s.’):  $p < 0.05$  ( $p > 0.05$ ), paired permutation tests followed by HPMC correction (Methods).  $a_{peak}$ :  $p < 0.001$  (25° vs. 35°),  $p < 0.001$  (35° vs. 45°),  $p < 0.001$  (25° vs. 45°);  $t_{peak}$ :  $p = 0.398$  (25° vs. 35°),  $p = 0.827$  (35° vs. 45°),  $p = 0.576$  (25° vs. 45°);  $t_{50}$ :  $p = 0.226$  (25° vs. 35°),  $p = 0.127$  (35° vs. 45°),  $p = 0.918$  (25° vs. 45°). (D) CAFs for targets of different contrast conditions (magenta: ‘low’ contrast - first three contrast levels from Fig. 1C; green: ‘high’ contrast - last four contrast levels; Methods); conventions as in A. (E) Plots of key CAF parameters for different contrast conditions; conventions and statistical methods as in C.  $a_{peak}$ :  $p < 0.001$  (low vs. high contrast conditions);  $t_{peak}$ :  $p < 0.001$ ;  $t_{50}$ :  $p = 0.747$ .

168  
169  
170

As a first step, we pooled trials from all mice ( $n=8$ ) across the different trial conditions (3 sizes x 7 contrasts), sorted them based on RT, and calculated conditional accuracy for each RT bin (100ms;

171 Fig.2A; Methods). We found that there were two distinct regimes in the relationship between conditional  
172 accuracy and RT: (1) for responses with RT between 200 ms (minimal RT) and 500ms, conditional  
173 accuracy was better for longer RT (Pearson's  $\rho=0.99$ ,  $p=0.02$ ), consistent with the 'speed-accuracy  
174 tradeoff' (SAT, Heitz2014); and (2) for responses with RT>500ms (and up to 3s, the task limit),  
175 conditional accuracy was independent of RT (Pearson's  $\rho=0.33$ ,  $p=0.11$ ).  
176 Drawing upon arguments in human behavioral studies, we reasoned that the first regime reflected the  
177 process of 'sensory encoding' [22-26], during which a slower response allows more sensory evidence to  
178 be acquired, thereby improving response accuracy. Upon completion of encoding, that is, upon full  
179 construction of the (internal) representation of target stimulus [25, 35], additional sampling would not  
180 benefit accuracy any further, resulting in the second regime in which accuracy does not trade off against  
181 RT. In contrast to the first one, the second regime can involve maintaining the acquired information for  
182 later responses, consistent with the visual short-term memory (VSTM, or visual working memory, VWM)  
183 idea in human literature (Philip1974; Vogel2006; Smith2009). We, therefore, termed the two regimes,  
184 respectively, the sensory encoding stage and the VSTM stage.

185  
186 To quantify the relationship between conditional accuracy and RT in the sensory encoding regime, we  
187 fitted the data with an asymptotic function (conditional accuracy function, CAF; Methods) [18-21]. We  
188 then estimated three key metrics of the sensory encoding phase for use in subsequent comparisons  
189 between trial conditions (Methods): (1) the peak conditional accuracy ( $a_{peak}$ ), (2) the timepoint at which  
190 conditional accuracy reached its peak ( $t_{peak}$ ), and (3) the timepoint at which conditional accuracy just  
191 exceeded 50% (chance) performance ( $t_{50}$ ; Methods).

192  
193 Specifically, we fit the CAF to data from trials of different stimulus sizes (Fig. 2B), and estimated the key  
194 metrics of sensory encoding (Methods; all contrasts included). We found that the peak conditional  
195 accuracy was significantly modulated by stimulus size (Fig.2C-left;  $a_{peak}$ : size 25° = 81.3 ±  
196 1.2%; size 35° = 88.0 ± 0.7%; size 45° = 92.4 ± 0.9%; \*,  $p<0.05$ , permutation tests with HBMC  
197 correction). The time to reach peak accuracy and the time to exceed chance performance were not  
198 significantly different across stimulus sizes ( $t_{peak}$ , Fig. 2C-middle, size 25° = 491 ± 56 ms, size 35° = 461 ±  
199 22 ms, size 45° = 467 ± 26 ms;  $t_{50}$ , Fig. 2C-right, size 25° = 190 ± 31 ms, size 35° = 221 ± 14 ms, size  
200 45° = 193 ± 20 ms)

201  
202 Next, we examined the effect of target contrast on the key metrics of sensory encoding. We fit the CAF to  
203 data from trials of different contrasts (Fig. 2D): contrasts were divided into two levels - low-contrast  
204 (contrast levels 1-3, all sizes included), and high-contrast (contrast levels 4-7, all sizes included,  
205 Methods). We found that the peak conditional accuracy was significantly modulated by stimulus contrast  
206 (Fig.2E-left;  $a_{peak}$ : low-contrast = 84.6 ± 0.9%; high-contrast = 89.5 ± 0.6%,  $p<0.001$ , permutation test),  
207 as was the time to reach peak accuracy (Fig.2E-middle;  $t_{peak}$ : low-contrast = 532 ± 30 ms; high-contrast =  
208 412 ± 17 ms,  $p<0.001$ , permutation test). We found no significant effect of stimulus contrast on  $t_{50}$  (Fig.  
209 2E-right, low-contrast = 213 ± 20 ms; high-contrast = 207 ± 12 ms,  $p=0.747$ , permutation test).

210  
211 Taken together, our findings support the conclusion that stimulus features pose intrinsic limits on  
212 discrimination performance: despite the abundance of time available for responding to the target (up to  
213 3s), the best level of accuracy that mice could possibly reach (and the time to reach peak accuracy) were  
214 still limited by stimulus features such as size and contrast.

### 215 **Effect of stimulus duration on mouse discrimination performance and VSTM**

216 In the above experiments, the variation of stimulus features of contrast and size modulated the sensory  
217 encoding regime of the conditional accuracy function. Because the stimulus duration in these experiments  
218 was fixed at 3s, equal to the time window allowed for mice to respond, there were no trials in which mice  
219 responded after stimulus offset. Therefore, it was not possible to test directly whether (and to what extent)  
220 mice relied on VSTM to generate responses.  
221



222  
223  
224  
225  
226  
227  
228  
229  
230  
231  
232  
233  
234  
235  
236  
237  
238  
239  
240  
241  
242

To address this issue and to explore the connection between performance and VSTM, i.e., the second regime of the conditional accuracy function, we next varied stimulus duration systematically, while maintaining the size and contrast fixed (at 25° and 99, respectively). This allowed us to analyze trials on which mice responded after the stimulus disappeared, i.e., trials on which mice may need to rely on the information maintained in VSTM to make their response. Since the information in VSTM is thought to decay over time and exhibit a finite lifetime [36-40], we predicted that for trials in which the mice responded after stimulus offset, the conditional accuracy would decline with longer RTs, allowing an estimate of the duration of VSTM. As an additional benefit, varying stimulus duration allowed us to directly estimate the shortest duration of the stimulus that resulted in above-chance discrimination performance in mice.

We found, first, that stimulus duration significantly modulated discrimination accuracy of mice (Fig.3A, one-way ANOVA,  $p=0.047$ ), with accuracy decreasing as the stimulus duration decreased (Pearson's  $\rho=0.74$ ,  $p=0.01$ ). This effect was driven by a commensurate effect of duration on perceptual discriminability (Fig. S2A; one-way ANOVA,  $p=0.001$ ; Pearson's  $\rho=0.74$ ,  $p=0.01$ ) but not decision criterion (Fig. S2B; one-way ANOVA,  $p=0.802$ ). There was also a trend of decreased RT as the stimulus duration decreased, although the effect was not statistically significant (Fig.3B, one-way ANOVA,  $p=0.133$ ; Pearson's  $\rho=0.86$ ,  $p<0.001$ ).

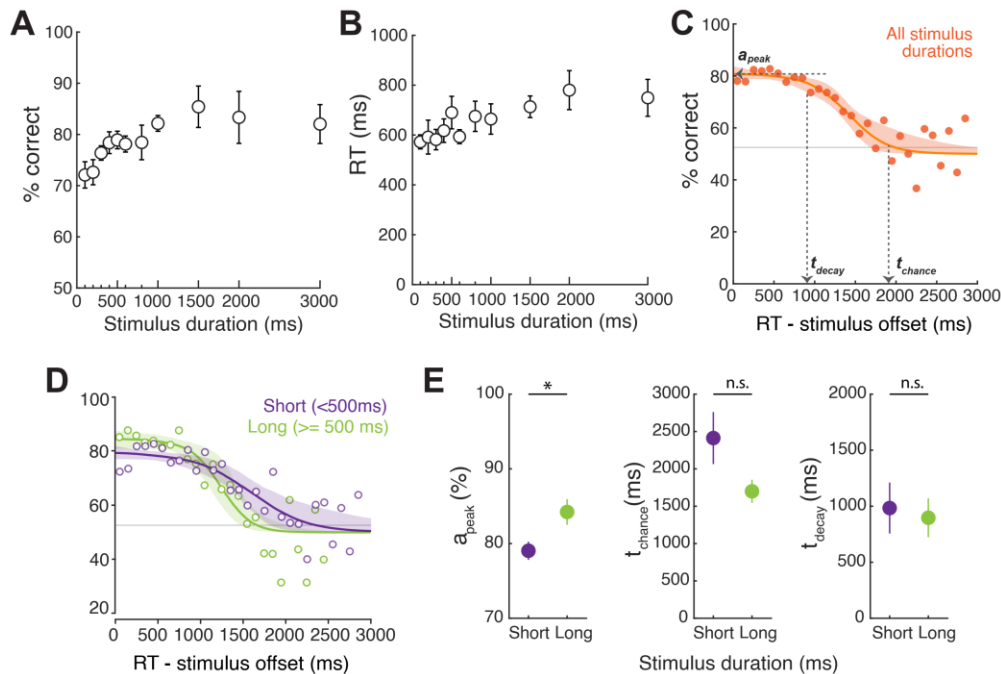

243  
244  
245  
246  
247  
248  
249  
250  
251  
252  
253  
254

**Figure 3. Stimulus duration modulates orientation discrimination performance, and the sensory encoding regime of the CAF.** (A) Psychometric plot of discrimination accuracy against stimulus duration. Data: mean ± s.e.m; n= 6 mice. 1-way ANOVA;  $p=0.047$ . (B) Plot of median reaction time (RT) against stimulus duration. 1-way ANOVA;  $p=0.133$ . (C) Plot of accuracy as a function of RT bins aligned to stimulus offset (conditional accuracy). Orange dots: Data pooled across all mice and stimulus durations; RT bin size = 100 ms. Orange curve: Conditional accuracy function, CAF (best-fit decaying logistic function; Methods); light orange shading: 95% CI of the fit (Methods). Indicated are one key parameter ( $a_{peak}$ ) describing the initial, sensory encoding stage, and two key parameters ( $t_{decay}$  and  $t_{chance}$ ) describing the VSTM-dependent stage sensory encoding stage of the CAF - the period during which accuracy and speed of response do not exhibit a tradeoff, and during which accuracy decays with RT (see text; Methods). Peak accuracy ( $a_{peak}$ ): mean ± s.d. =  $80.9 \pm 1.2\%$ ; time when the performance starts to decay

255 from  $a_{\text{peak}}$  ( $t_{\text{decay}}$ ):  $931 \pm 181$  ms; time at which performance decays to chance levels ( $t_{\text{chance}}$ ):  $2066 \pm 285$  ms  
256 (Methods). (D) CAFs for trials with short (<500 ms, purple) and long ( $\geq 500$  ms, green) stimulus duration;  
257 conventions as in C. (E) Plots of key parameters of CAFs in (D) for different stimulus durations. Data show mean  $\pm$   
258 s.t.d of distribution of bootstrapped estimates (Methods). ‘\*’ (‘n.s.’):  $p < 0.05$  ( $p > 0.05$ ), paired permutation test  
259 (Methods);  $a_{\text{peak}}$ :  $p = 0.013$  (short vs. long stimulus conditions);  $t_{\text{chance}}$ :  $p = 0.177$ ;  $t_{\text{decay}}$ :  $p = 0.796$ . **See also Fig. S2.**  
260 For the conditional accuracy analysis, we focused on the second regime of the CAF, to investigate if  
261 mouse discrimination accuracy declined after the stimulus disappeared. We pooled data from all mice  
262 ( $n = 6$ ), aligned trials of all stimulus durations by the time of stimulus offset, and calculated conditional  
263 accuracy as a function of RT (after stimulus offset, Fig. 3C). Consistent with our prediction, the  
264 conditional accuracy declined with RTs longer than stimulus offset, supporting a decaying VSTM  
265 process.

266  
267 To quantify the time course of decay, we fit the data using a sigmoidal function (Methods), and estimated  
268 two key metrics of the VSTM phase for use in subsequent comparisons between trial conditions  
269 (Methods): (1) the time point at which the conditional accuracy started to decline ( $t_{\text{decay}}$ ); and (2) the first  
270 timepoint at which the discrimination accuracy dropped to a level indistinguishable from the chance  
271 ( $t_{\text{chance}}$ ; Methods); indicating that information is no longer available in VSTM.

272  
273 We found that for the data pooled across stimulus durations, the first instant ( $t_{\text{decay}}$ ) at which the  
274 conditional accuracy dropped significantly below the peak accuracy was about 900 ms after stimulus  
275 offset (Fig. 3C,  $t_{\text{decay}}$ , mean  $\pm$  s.d. =  $931 \pm 181$  ms). Conditional accuracy dropped down to chance levels at  
276 about 2100 ms after the stimulus offset (Fig. 3C,  $t_{\text{chance}} = 2065 \pm 285$  ms), which allows for estimating the  
277 duration of mouse VSTM (see last section in Results).

278  
279 Studies in humans using a variety of techniques have reported a robust effect of stimulus duration on  
280 VSTM, called the ‘inverse duration effect’. This describes the phenomenon that the longer a stimulus  
281 lasts, the shorter is its persistence in VSTM after the stimulus offset [33, 41, 42]. To investigate if the  
282 inverse duration effect occurs in mice as well, we split our data into two subsets: (1) trials with stimulus  
283 duration < 500ms (100-400ms); and (2) trials with stimulus duration  $\geq 500$ ms (500-2000ms), and  
284 repeated the conditional accuracy analysis for the two subsets of trials.

285  
286 We found that compared to short-stimulus trials, long-stimulus trials tended to have a shorter duration  
287 over which the conditional accuracy remains above chance after stimulus offset (Fig. 3DE;  $t_{\text{chance}}$ : long-  
288 stimulus, mean  $\pm$  s.d. =  $1699 \pm 155$  ms; short-stimulus =  $2413 \pm 349$  ms  $p = 0.177$ , permutation test). This  
289 trend is consistent with the findings of human studies, although the difference does not reach statistical  
290 significance in our dataset. There was no difference between two groups in terms of when the conditional  
291 accuracy started to decay ( $t_{\text{decay}}$ , long-stimulus =  $897 \pm 173$  ms; short-stimulus =  $984 \pm 228$  ms  $p = 0.796$ ,  
292 permutation test).

293  
294 Incidentally, the peak accuracy was higher for long-stimulus trials than short-stimulus trials (long-  
295 stimulus =  $84.2 \pm 1.7\%$ ; short-stimulus =  $79.0 \pm 1.2\%$ ,  $p = 0.013$ , permutation test). This could be the result  
296 of the sensory encoding stage being terminated prematurely in short-stimulus trials, consistent with the  
297 finding from Figure 2A that it takes about 500ms for the stimulus to be fully encoded (i.e., peak  
298 conditional accuracy is reached).

299  
300 Taken together, our results demonstrate that stimulus duration significantly modulates mouse  
301 performance in discriminating grating orientation. Discrimination accuracy is lower when stimulus  
302 duration is constrained (Fig. 3A), the potential result of a combination of two factors: (1) the *encoding* of  
303 visual information is terminated earlier when the stimulus is short (<500ms), consistent with the lower  
304 peak conditional accuracy for short vs. long stimuli (Fig. 3E, left), and (2) the duration of *maintenance* of  
305 visual information necessary for correct responding (i.e., of VSTM) is limited (Fig. 3C).

306  
307  
308  
309  
310  
311  
312  
313  
314  
315  
316  
317  
318  
319  
320  
321  
322  
323

## Simultaneous presentation of a task-relevant foil ('flanker') modulates conditional accuracy function

The tasks thus far involved the presentation of a single stimulus ('target'), in which mice were challenged by varying stimulus properties. Another factor that can limit animals' performance is the sensory context in which the target is presented. For instance, the co-occurrence of a task relevant foil stimulus with conflicting information from the target stimulus can interfere with perceptual performance, as demonstrated in the classic flanker task in humans [43, 44]. In this task, the target is always presented at a fixed location, but competing stimuli with congruent or incongruent task-relevant information are presented at flanking locations. In a recent study in mice, using a mouse version of the flanker task, we demonstrated similar result: the presence of a foil stimulus with conflicting information ('incongruent flanker') significantly impaired mouse discrimination performance, but not the presence of a foil stimulus with congruent information ('congruent flanker'; Fig. 4AB; Methods). The stimuli in this task were presented for 1000 ms. Here, we re-analyzed that dataset with the conditional accuracy analysis to investigate whether the performance reduction observed was due to the interference by the incongruent flanker in the process of sensory encoding, or in the maintenance of target information in VSTM.

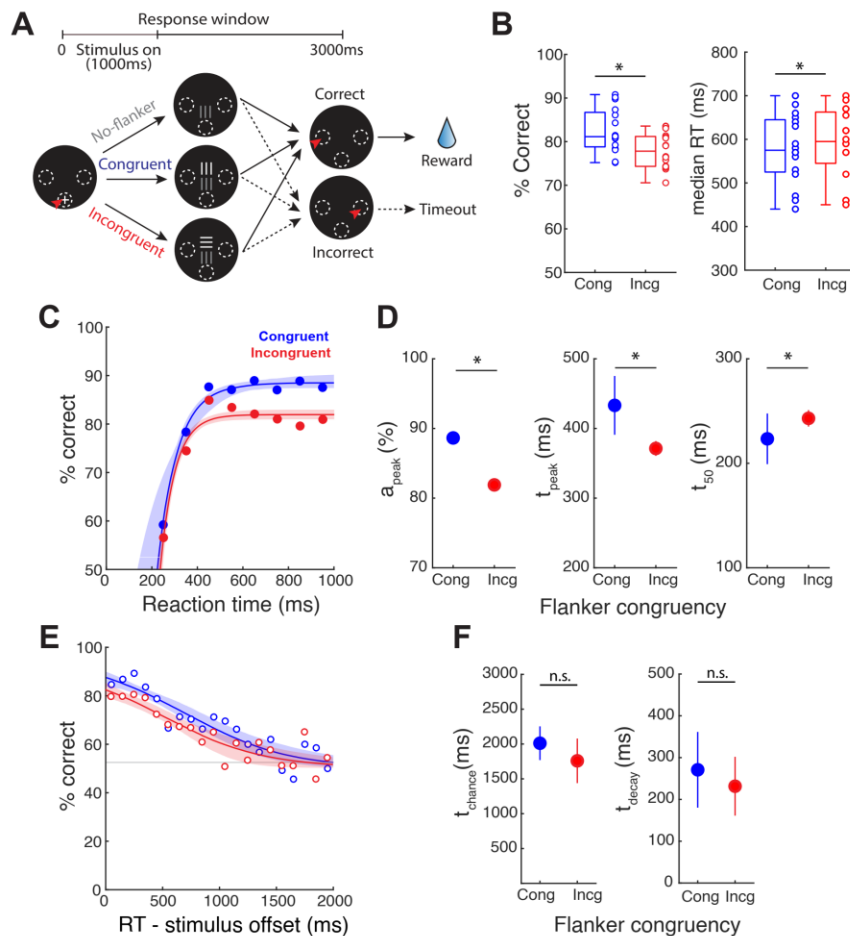

324  
325  
326  
327  
328  
329

**Figure 4. Incongruent flanker reduces target discrimination accuracy and affects the sensory encoding regime of the CAF.** (A) Schematic of the flanker task; target grating is always presented at the lower location; a second 'flanker' grating (orthogonal orientation – incongruent flanker, or same orientation – congruent flanker) is presented simultaneously, and always at the upper location; contrast of flanker is systematically varied (adapted



330 from [16]). All other conventions as in Fig. 1. Plots represent results from new analyses applied to previously  
331 reported data [16] after collapsing across all flanker contrasts (Methods). **(B) Left panel:** Comparison of  
332 performance between trials with incongruent vs. congruent flanker.  $p < 0.001$ , signed rank test. **Right panel:**  
333 Comparison of median RT between trials with incongruent vs. congruent flanker.  $p = 0.019$ , signed rank test.  
334 **(C)** CAFs of the sensory encoding stage; data correspond to trials with RT < stimulus offset, i.e., 1000 ms. **Blue:**  
335 trials with congruent flanker. **Red:** trials with incongruent flanker. **(D)** Plots of key parameters of CAFs (sensory  
336 encoding stage) for trials with congruent vs. incongruent flanker;  $a_{peak}$  (left),  $t_{peak}$  (middle), and  $t_{50}$  (right). Data show  
337 mean  $\pm$  s.t.d of distribution of bootstrapped estimates. ‘\*’ (‘n.s.’):  $p < 0.05$  ( $p > 0.05$ ), permutation tests followed by  
338 HBMC correction, congruent vs. incongruent flanker conditions (Methods).  $a_{peak}$ :  $p < 0.001$ ;  $t_{peak}$ :  $p = 0.01$ ;  $t_{50}$ :  
339  $p = 0.022$ . **(E)** CAFs of the VSTM-dependent stage; data correspond to trials with RT > stimulus offset (1000 ms),  
340 aligned to stimulus offset. **Blue:** trials with congruent flanker. **Red:** trials with incongruent flanker. **(F)** Plots of key  
341 parameters of CAFs (VSTM-dependent stage) for trials with congruent vs. incongruent flanker;  $t_{chance}$  (left) and  $t_{decay}$   
342 (right). Conventions and statistical methods as in D.  $t_{chance}$ :  $p = 0.505$ ;  $t_{decay}$ :  $p = 0.410$ .

343  
344 We pooled trials from all mice into two groups based on their flanker congruency – i.e., congruent vs.  
345 incongruent. Following that, for each group, we sorted the trials based on their RT. Trials with RT shorter  
346 than the duration of stimulus (1000ms), i.e., trials in which mice responded before the stimulus ended,  
347 were used to investigate the sensory encoding regime (per the approach used in Figure 2). Separately,  
348 trials with RT longer than the duration of stimulus, i.e., trials in which mice responded after stimulus  
349 offset, were used to investigate the VSTM stage (per the approach used in Figure 3).

350  
351 We found that in the sensory encoding regime (Fig. 4CD), the peak conditional accuracy for incongruent  
352 trials was significantly lower than that of congruent trials (Fig. 4D-left; congruent =  $88.6 \pm 0.8\%$ ,  
353 incongruent =  $81.9 \pm 0.5\%$ ;  $p < 0.001$ , permutation test), and the time at which performance just exceeded  
354 the 50% (chance) level was longer for incongruent trials (Fig. 4D-right;  $t_{50}$ : congruent =  $223 \pm 24$  ms;  
355 incongruent =  $243 \pm 8$  ms  $p = 0.022$ , permutation test). The time to reach peak accuracy was, however,  
356 shorter for incongruent trials (Fig. 4D-middle;  $t_{peak}$ : congruent =  $433 \pm 42$  ms; incongruent =  $371 \pm 11$  ms;  
357  $p = 0.01$ , permutation test), consistent with the higher  $a_{peak}$  (Fig. 4D-left) combined with similar slopes of  
358 the CAF (Fig. 4C).

359  
360 By contrast, there was no effect of flanker congruency on the time course of decay of conditional  
361 accuracy following offset of the target and flanker stimuli (i.e., the VSTM stage). The time at which  
362 conditional accuracy dropped to chance was not different between congruent and incongruent flanker  
363 trials (Fig. 4EF;  $t_{chance}$ : congruent =  $2011 \pm 242$  ms; incongruent =  $1759 \pm 320$  ms,  $p = 0.505$ , permutation  
364 test), nor on the time at which conditional accuracy dropped just below  $a_{peak}$  ( $t_{decay}$ : congruent =  $271 \pm 91$   
365 ms; incongruent =  $232 \pm 70$  ms,  $p = 0.410$ , permutation test).

366  
367 In sum, we found that the interference in performance due to the incongruent flanker mainly impacted the  
368 process of sensory encoding ( $a_{peak}$ ; as if weakening the target), but not the VSTM stage.

### 369 370 **Relative target contrast (target:foil) modulates mice’s performance in visual target selection**

371 We next challenged mice with a visual search task, which involved added complexity compared to the  
372 flanker task. Here, after a trial was initiated, the target grating could be presented either alone (‘singleton  
373 trial’) or together with a second grating (foil; ‘search trial’; Fig. 5A). However, unlike the flanker task, (a)  
374 the target was defined as the stimulus of higher contrast (as opposed to the stimulus at a particular  
375 location), (b) the location of the target was randomized on a trial-by-trial basis, and (c) the orientation of  
376 the foil was always orthogonal to the orientation of the target (chosen randomly on each trial to be either  
377 horizontal or vertical). The relative contrast of the target:foil was varied systematically from 1.73 to 64.8  
378 following a contrast morphing protocol: the contrast of one stimulus decreased while that of the other  
379 increased over the range of contrasts. In the singleton trials, the contrast of the target was varied over the  
380 same range (Fig. 5A-right; Methods). This task adds complexity over the flanker task as it not only  
381 contains a task-relevant competitor, but in addition, involves uncertainty of the target location.

382  
383

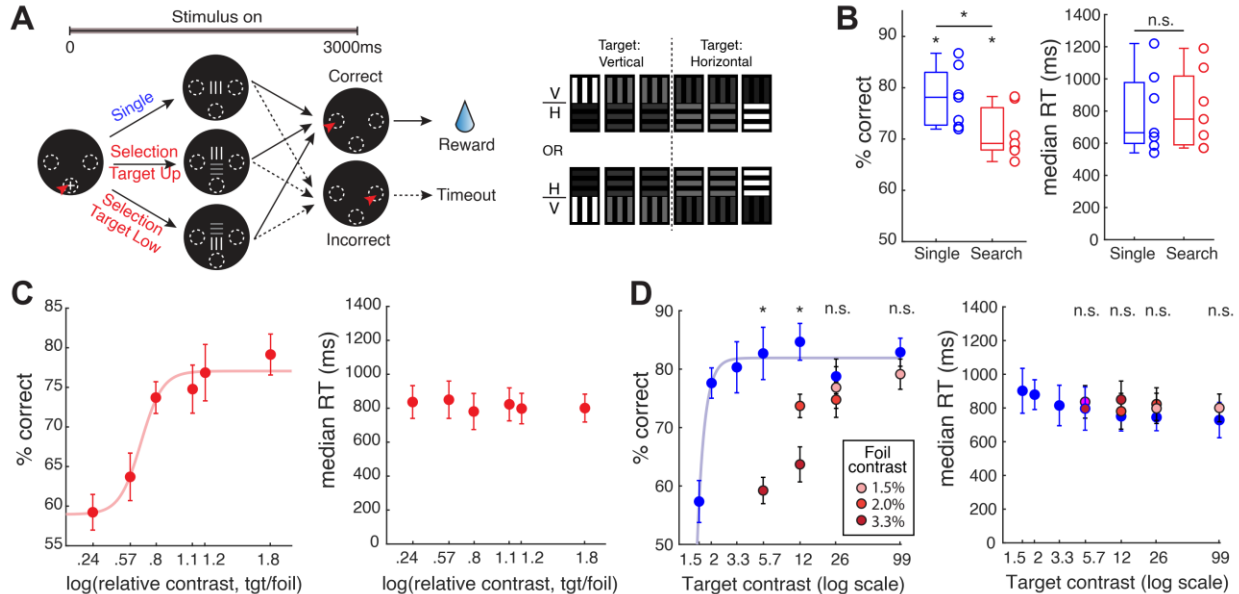

384  
385

**Figure 5. Foil contrast modulates target discrimination accuracy in visual search task.** (A) Left: Schematic of rudimentary visual search task. Two gratings of different contrasts and orthogonal orientations are presented simultaneously; the target is defined as the grating of higher contrast. Relative contrast of target and foil are varied following a contrast morphing protocol. Right: Schematic of contrast morphing protocol: as the contrast of vertical grating decreases (from left to right), the contrast of paired horizontal grating increases. Therefore, the target can be either the vertical (left half of example pairs) or the horizontal grating (right half of example pairs). Additionally, the target (higher contrast) grating can occur either at the upper location or at the lower location with equal probability. Only a subset of grating pairs are shown here as examples; all other conventions as in Fig. 1. (B) Effect of foil on response accuracy (left) and median RT (right); data from trials pooled across all relative contrast conditions. Single-stimulus trials vs. search trials; response accuracy:  $p=0.016$ ; signed rank test (\*\*); median RT:  $p=0.484$ , signed rank test ('n.s.'). Response accuracy was additionally significantly higher than chance (50%) for search trials ( $p=0.016$ , signed rank test). (C) Psychometric curve of response accuracy (left) and median RT (right) plotted against relative contrast of target:foil. Red curve: best sigmoidal fit (Methods). Left:  $p<0.001$ , 1-way ANOVA. Right:  $p=0.996$ , 1-way ANOVA. (D) Comparison of discrimination performance when target was presented alone (blue data points) vs. when it was presented with foil (red data points). Left: Accuracy. Right: median RT. Darker shades of red: higher contrasts of foil. \* (n.s.):  $p<0.05$  ( $p>0.05$ ), Kruskal-Wallis tests followed by HBMC correction (Methods). See also Fig. S3.

403

We found that mice were able to learn this search task well. Their discrimination accuracy was significantly higher than chance in both trial types (Fig. 5B, left panel; singleton trials, median=78.1%, [72.0, 84.3],  $p=0.016$ , signed rank test; search trials, median=69.1%, [64.2, 74.0],  $p=0.016$ , signed rank test). Compared to the singleton trials, mouse discrimination accuracy was significantly lower in the selection trials ( $p=0.016$ , signed rank test), indicating impairment in performance due to the presence of the foil.

410

The search task also yielded a classic psychometric curve of performance (Fig. 5C). Mouse discrimination accuracy was dependent on the relative target contrast (Fig. 5C-left, one-way ANOVA,  $p<0.001$ ): as the relative target contrast decreased, discrimination accuracy decreased as well. This reduction was not simply due to that the target being dimmer in those pairs with low relative target contrast: Comparing the discrimination accuracy of the same target when it was presented alone, versus when it was presented with a foil, demonstrated that the deterioration in accuracy was due to and dependent on the contrast of

416

417 foil (Fig. 5D-left, Kruskal-Wallis test with HB correction). Additionally, these effects on discrimination  
418 accuracy were driven by commensurate changes in perceptual discriminability (Fig. S3AB, left panel)  
419 rather than changes in decision criterion (Fig. S3AB, right panel). In contrast to discrimination accuracy,  
420 RT was minimally affected by the presence of foil (Fig. 5B, right panel:  $p=0.48$ , signed rank test) nor by  
421 the relative target contrast (Fig. 5C - right: one-way ANOVA,  $p=0.996$ ; Fig. 5D - right).

422  
423 We next performed the conditional accuracy analysis on this dataset and analyzed the sensory encoding  
424 stage following the approach outlined in Figure 2 (Fig. S3DE; the stimulus duration was equal to the  
425 response window, 3s, in this task). We found that search trials had a lower peak accuracy than singleton  
426 trials (Fig. S3E-left;  $a_{peak}$ : singleton trials =  $80.0 \pm 1.9\%$ , search trials =  $73.1 \pm 1.4\%$ ,  $p=0.004$ ,  
427 permutation test). The time to reach peak accuracy was not statistically different between the two  
428 conditions (Fig. S3E-middle;  $t_{peak}$ : singleton trials =  $417 \pm 44$  ms, search trials =  $371 \pm 42$  ms,  $p=0.418$ ,  
429 permutation test), and neither was the time at which performance just exceeded the 50% (chance) level  
430 (Fig. S3E-right;  $t_{50}$ : singleton trials =  $257 \pm 24$  ms, search trials =  $274 \pm 13$  ms,  $p=0.434$ , permutation  
431 test).

432  
433 In addition, search trials with low relative contrast of the target (trials corresponding to first three relative  
434 contrast values) had lower peak accuracy than those with high relative contrast (trials corresponding to  
435 last three relative contrast values; Fig. S3F, S3G-left;  $a_{peak}$ : high relative contrast search trials =  $80.8 \pm$   
436  $2.0\%$ ; low relative contrast search trials =  $65.8 \pm 2.2\%$ ;  $p<0.001$ , permutation test). There was no  
437 significant effect of relative contrast on the time to reach peak accuracy (Fig. S3G-middle;  $t_{peak}$ : high  
438 relative contrast =  $415 \pm 91$  ms; low relative contrast =  $342 \pm 66$  ms;  $p=0.349$ , permutation test), nor on  
439 the time at which performance just exceeded the 50% (chance) level (Fig. S3G-right;  $t_{50}$ : high relative  
440 contrast =  $270 \pm 18$  ms; low relative contrast =  $269 \pm 32$  ms;  $p=0.944$ , permutation test)

441  
442 In order to make the search task more challenging, and to potentially investigate the effect of the foil on  
443 the VSTM-dependent regime, we reduced the stimulus duration to 800 ms (from 3000 ms). However, of  
444 the 7 mice that we attempted to train on this more difficult search task, we found that only 2 reached the  
445 criterion for successful demonstration of learning in this task, namely, accuracy  $\geq 70\%$  across all trial  
446 types (Fig. S3H- filled dots; S3I; Methods). This was in contrast with the original search task (Fig. 5B) in  
447 which all mice consistently exhibited  $>70\%$  accuracy in single target trials.

448  
449 Thus, mice were able to learn the original search task (with stimulus duration = 3s), and their performance  
450 was systematically affected by the presence and strength (contrast) of the foil, which significantly  
451 modulated the sensory encoding stage of the CAF. However, when stimulus duration was reduced (800  
452 ms), the task appeared to exceed the capability of most mice (5/7).

453  
454

#### 455 **Stimulus onset delay modulates mice's performance and reveals impulsivity of mice**

456 Finally, we were interested in another 'limit' related to mouse performance. We wished to assess  
457 quantitatively the extent to which mice are naturally able to withhold responding when there is a delay in  
458 the arrival of information pertinent to the task, i.e., their ability to adjust the timing of their responses  
459 adaptively to the temporal statistics of the stimulus. To this end, we trained mice on the single stimulus  
460 discrimination task (as in Fig. 1), and systematically varied the delay between trial initiation and onset of  
461 the target (stimulus onset delay).

462  
463 We found that discrimination accuracy was not modulated by the stimulus onset delay (Fig. 6A; one-way  
464 ANOVA,  $p=0.337$ ) although there was a trend towards lower performance for longer delays. Similarly,  
465 there was no effect of stimulus onset delay on perceptual discriminability or decision criterion (Fig.  
466 S4AB). We next examined the effect of stimulus onset delay on RT. If animals are able to withhold  
467 responding until the target comes on and information about the orientation becomes available, then we

468 would expect the RT distributions, and therefore the median RT to remain unchanged as a function of  
 469 delay (because RT is measured with respect to target onset). However, we found a significant *reduction* in  
 470 the median RT as the stimulus onset delay increased (Fig. 6B; one-way ANOVA,  $p < 0.018$ ; Pearson's  $\rho =$   
 471  $-0.99$ ,  $p = 0.023$ ) – mice were responding earlier when the stimulus onset delay was longer. To gain insight  
 472 into this puzzling finding, we replotted the response time data, but now, calculating reaction time ( $RT_{INI}$ )  
 473 as the time of response from trial initiation (instead of from stimulus onset; Fig. 6C). Our motivation for  
 474 this analysis was the hypothesis that perhaps mice are insensitive to stimulus onset delay. If so, we would  
 475 expect the distributions of  $RT_{INI}$  (and the median  $RT_{INI}$ s) to be nearly identical across delays, thereby  
 476 explaining the decrease in RT as a function of delay. We found that  $RT_{INI}$  showed an increasing trend  
 477 with stimulus onset delay (Fig. 6D; Pearson's  $\rho = 0.999$ ,  $p = 0.035$ ), but with the magnitude of the change  
 478 in median  $RT_{INI}$  being less than the magnitude of change in delay (average  $\Delta$  median  $RT_{INI} = 36$  ms vs.  $\Delta$   
 479 delay = 100 ms between the first two delays, and average  $\Delta$  median  $RT_{INI} = 43$  ms vs.  $\Delta$  delay = 100 ms  
 480 between between the second two delays).  
 481

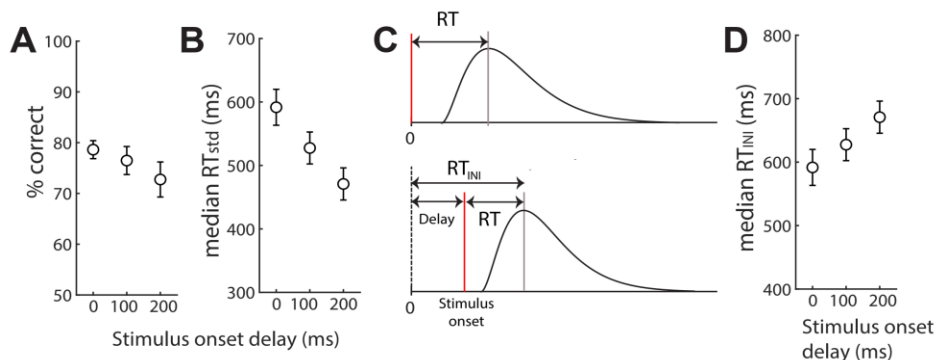

482 **Figure 6. Stimulus onset delay modulates RT of orientation discrimination and allows quantification of**  
 483 **impulsivity in freely behaving mice.** (A) Plot of response accuracy against stimulus delay;  $p = 0.337$ , 1-way  
 484 ANOVA;  $\rho = 0.988$ ,  $p = 0.098$ . (B) Plot of median RT against stimulus delay; RT calculated from stimulus onset;  
 485  $p = 0.018$ , 1-way ANOVA;  $\rho = 0.99$ ,  $p = 0.023$ . (C) Schematic illustrating distributions of response times under two  
 486 conditions: Top panel – no delay; Bottom panel: non-zero stimulus onset delay. 0 indicates trial initiation, red line  
 487 indicates stimulus onset. Bottom panel illustrates two different ways in which response times are calculated here:  
 488 with respect to stimulus onset (RT; the standard method), or with respect to trial initiation ( $RT_{INI}$ ). (D) Plot of  
 489 median  $RT_{INI}$  against stimulus delay.  $RT_{INI}$  is slower for greater onset delay (Pearson's  $\rho = 0.999$ ,  $p = 0.035$ ),  
 490 indicating that mice are able to sense the delay and withhold their response. However, they do not withhold for the  
 491 entire duration of the delay. The ratio of duration for which they withhold over delay duration is defined the  
 492 impulsivity index ( $= 0.6$  for mice). **See also Fig. S4.**  
 493

494 Thus, mice appear to be able to sense stimulus onset delays and withhold their responses (resulting in  
 495 longer  $RT_{INIS}$ ), but are unable to do so for the full duration required (resulting in shorter RTs). As a result,  
 496 their responses were often premature (or 'impulsive'), with movement initiated before the stimulus was  
 497 even presented, causing them to guess more often.  
 498

499 These data allowed us to estimate impulsivity quantitatively with an 'impulsivity index':  $ImpI = 1 -$   
 500 (duration that mice waited / duration of optimal wait time).  $ImpI = 0$  would indicate that animals are non-  
 501 impulsive (optimal), higher positive values of  $ImpI$  would indicate that animals are more impulsive, with  
 502  $ImpI = 1$  indicating that animals that are unable to withhold responding at all (maximally impulsive). In the  
 503 case of our mice,  $ImpI$  was  $\sim 0.6$ .  
 504

505 In line with the analysis approach in previous tasks, we examined the effect of stimulus onset delay on the  
 506 conditional accuracy function to characterize both the sensory encoding stage as well as the VSTM stage  
 507 in this task. We found that there was no effect of stimulus onset delay on the encoding regime (Fig.  
 508 S4DE;  $a_{peak}$ : no delay =  $83.4 \pm 1.9\%$ ; delay =  $83.1 \pm 2.6\%$ ;  $p = 0.921$ , permutation test;  $t_{peak}$ : no delay =  
 509



510 430 ± 64 ms; delay = 417 ± 136 ms; p=0.887, permutation test; t<sub>50</sub>: no delay = 193 ± 47 ms; delay = 147 ±  
511 47 ms; p=0.105, permutation test), nor on the VSTM regime (Fig. S4FG; t<sub>chance</sub>: no delay = 1611 ± 337  
512 ms; delay = 2106 ± 599 ms; p=0.064, permutation test; t<sub>decay</sub>: no delay = 898 ± 217 ms; delay = 641 ± 266  
513 ms; p=0.156, permutation test).

514

515 Thus, varying the stimulus onset delay did not affect either the sensory encoding or the VSTM regimes of  
516 response, but revealed the impulsivity of mice and allowed a quantitative characterization of impulsivity  
517 in mice.

518

### 519 **Estimates of motor response time, visual stimulus sampling period and length of visual short term** 520 **memory**

521 The conditional accuracy analysis yielded estimates of key time points within the two regimes of the  
522 CAF, namely, t<sub>peak</sub> and t<sub>50</sub> for the sensory encoding regime, and t<sub>decay</sub> and t<sub>chance</sub> for the VSTM-dependent  
523 regime. These values, which were all measured as reaction times, included two fixed overheads: (a) the  
524 sensory processing delay -- time taken for the visual periphery to transduce and relay sensory information  
525 to visual brain areas, i.e., neural response latency), as well as (b) the motor execution delay -- the time  
526 between the brain making the decision and the animal reporting its choice, corresponding to the actual  
527 time for movement of the mouse's head and body to achieve a nose-touch in this case. To obtain accurate  
528 estimates of the durations of the underlying decision processes, it would be important to subtract away the  
529 fixed sensory and motor "overheads".

530

531 An analysis method that permits the combined estimation of this fixed overhead time is drift diffusion  
532 modeling (DDM [45, 46]; Methods). The DDM model is fit to the full RT distributions obtained in 2-  
533 choice behavioral tasks to estimate four different parameters corresponding to potential psychological  
534 variables underlying performance. One of the parameters is exactly the quantity we are interested in,  
535 namely, the fixed 'overhead' time accounting for both sensory and motor execution delays, and is  
536 typically termed the 'non-decisional constant' in DDMs. The other three parameters are: the rate of  
537 evidence accumulation (drift rate), the distance between the subject's decision boundaries, and the  
538 internal bias of the subject towards one of the choices.

539

540 We fit the DDM to the left-light choice RT distributions of mice in several of the tasks in this study, and  
541 in each case estimated the values of the four parameters [47, 48]. Specifically, we quantified the non-  
542 decisional constant in each case (Fig. 7). We found that in each case, the non-decisional constant was not  
543 modulated significantly by the variable of interest in that task (Fig. 7A, size and contrast of target: 2-way  
544 ANOVA, size: p=0.308, contrast: p=0.523; interaction: p=0.931; 7B, flanker congruency and contrast: 2-  
545 way ANOVA, congruency: p=0.343, contrast: p=0.998; interaction: p=0.993; Fig. 7C, relative contrast of  
546 target:foil: 1-way ANOVA, p=0.269). Additionally, the mean values of the non-decisional constant were  
547 nearly identical across tasks (7A- 210 ms ± 9.6 ms, 7B- 212 ms ± 6.9 ms, 7C: 188 ms ± 9.5 ms). Based on  
548 these results, we estimated that the fixed overhead for mice across all our tasks was approximately 200  
549 ms.

550



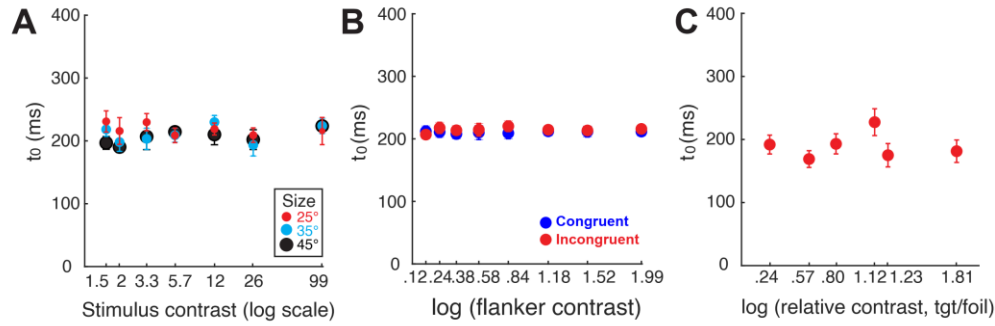

551  
552

553 **Figure 7. Drift diffusion modeling reveals nearly fixed time for combined sensory latency and motor**  
554 **execution (non-decisional time,  $t_0$ ) across tasks.** (A) Estimates of  $t_0$  by drift diffusion modeling as a function of  
555 stimulus size and contrast (same dataset as in Fig. 1; Methods). 2-way ANOVA,  $p=0.523$  (contrast),  $p=0.308$  (size),  
556  $p=0.931$  (interaction). (B) Estimates of  $t_0$  as a function of flanker congruency and flanker contrast in flanker task  
557 (same dataset as in Fig. 4; Methods). 2-way ANOVA,  $p=0.343$  (flanker congruency),  $p=0.998$  (flanker contrast),  
558  $p=0.993$  (interaction). (C) Estimates  $t_0$  as a function of relative contrast of target:foil in visual search task (same  
559 dataset as in Fig. 5; Methods);  $p=0.269$ , 1-way ANOVA. **See also Fig. S5.**

560

561 With this information, we then estimated the window for sensory encoding (temporal integration) as  $t_{\text{peak}} -$   
562  $200 \text{ ms} = 300 \text{ ms}$  (Fig. 2A;  $t_{\text{peak}} \approx 500 \text{ ms}$ ). We also estimated the duration of visual short term memory  
563 as the duration of the period starting from 200 ms after stimulus offset (the last instant at which a  
564 response could have been initiated with the stimulus still on the screen), to 200 ms before  $t_{\text{chance}}$  (the last  
565 instant at which responses that are better than chance was initiated). Thus, we estimated the duration of  
566 mouse VSTM as  $t_{\text{chance}} - 2*200\text{ms} = 1700 \text{ ms}$  (Fig. 3C;  $t_{\text{chance}} \approx 2100 \text{ ms}$ ).

567

568

## 569 DISCUSSION

570

571 In this study, we explored the limits of the visual discrimination performance in freely behaving mice by  
572 systematically manipulating stimulus size, contrast, duration, delay and sensory context in a 2AFC,  
573 orientation discrimination task. The resulting psychometric curves revealed that mouse discrimination  
574 performance was robust to key stimulus features, and persisted in the presence of a foil stimulus. By  
575 revealing parallels in perceptual processes in humans and mice, our results indicated that although mice  
576 have poorer visual acuity compared to primates [1, 11], their visual perceptual abilities may be  
577 underrated. These findings establish a quantitative, psychophysical foundation for the future study of the  
578 neural basis of visually guided behavior in mice.

579

### 580 Performance at small stimulus feature values

581 In general, shrinking the size of stimulus, lowering the stimulus contrast, or shortening the stimulus  
582 duration all caused deterioration of discrimination performance (as expected). However, mice were able  
583 to respond to visual stimuli that were smaller, more brief, and in general, more demanding than those  
584 typically used in studies of vision and visually guided behavior in mice [6, 9, 11, 12, 49]. Based on the  
585 ranges of values that we tested, mice were able to discriminate vertical versus horizontal gratings at a  
586 stimulus size as small as  $25^\circ$ , and for that small size, they could discriminate a stimulus as short as 100 ms  
587 (at full contrast), or with as low contrast as 1.5 (at duration of 3s). Even at small stimulus sizes, low  
588 contrasts, and short durations, mice were able to perform consistently better than chance, with an  
589 accuracy of 70-75%.

590

### 591 Performance at large stimulus feature values

592 At the other end of the range, performance plateaued at 93% for a size of 45°, suggesting that the full  
593 field stimuli that have been previously used in mouse visual studies may be effectively replaced by 45°  
594 large stimuli without appreciable loss in performance. Similarly, performance plateaued at 83% for  
595 stimulus duration  $\geq$  1000 ms, indicating that stimuli longer than 1000 ms may not be needed to test mouse  
596 behavior effectively in single-stimulus discrimination tasks. Finally, with respect to stimulus contrast,  
597 although mouse performance generally improved as the contrast increased, there appeared to be a dip in  
598 performance as the stimulus reached full contrast. Such inverted U-shaped performance curves as a  
599 function of contrast have been reported previously in mice in a go/no-go task [9]. A potential explanation  
600 that has been offered is that this dip is due to the variability of stimulus contrast inherent when multiple  
601 values are tested [9]. Since the visual system is known to adapt to the range of stimulus contrast for best  
602 encoding [50], it is possible that the large variability in contrast values in an experiment that  
603 parameterizes contrast makes the full-contrast stimulus unfavorable because of signal saturation. Our data  
604 are consistent with this idea: mouse performance to full-contrast gratings was worse when the stimuli  
605 were intermixed with other contrasts (Fig. 1C, mean accuracy= [79%, 81%, 85%] corresponding the three  
606 stimulus sizes), compared to when they were presented at a single contrast (Fig. S1F, mean accuracy=  
607 [85%, 90%, 94%]). For all the stimulus parameters tested, changes in discrimination accuracy were  
608 accompanied by changes in sensitivity rather than decision criterion, indicating that the manipulations all  
609 modulated aspects of the perceptual process.

610

### 611 **Orientation discrimination: rapid, discrete perceptual processing or fast integration-to-threshold?**

612 Measurements of RT in these tasks revealed an intriguing result: median RT was approximately 600 ms  
613 in nearly all experiments, and, notably, was either unaffected by stimulus manipulations, or when it was,  
614 changed within a range of approximately 100 ms. This result is distinct from findings in perceptual  
615 decision-making tasks such as the random dot motion discrimination (RDM) task (in primates), in which  
616 increasing task difficulty substantially slowed down RT, by more than 500 ms [51, 52]. Such tasks are  
617 well accounted for by an accumulation-to-threshold process underlying perceptual decision-making:  
618 Waiting longer to respond in tasks that are more perceptually difficult (i.e., with slower rates of sensory  
619 evidence) would result in accumulation of more evidence, and thereby benefit performance. However, our  
620 result of largely flat RTs is similar to findings from odor discrimination tasks in rodents [53, 54], in which  
621 increasing task difficulty did not significantly increase RT. These tasks, in which rats exhibited nearly  
622 constant odor sampling times of  $\sim$ 300 ms, have been shown to not be accounted for by accumulation-to-  
623 threshold processes, even with short integration timescales and changing thresholds [55]. Rather they  
624 have been shown to represent a distinct, rapid form of perceptual decision-making that involves discrete  
625 sampling of low-level sensory information [55].

626

627 Our drift diffusion modeling helped disambiguate whether the performance of mice in our tasks was  
628 better explained as an integration-to-threshold process (as in monkey RDM tasks) or a rapid form of  
629 perceptual process with snapshot sampling (as in rodent odor discrimination tasks). We found that across our  
630 tasks, drift rates systematically changed with task difficulty (Fig. S5AEI). Notably, decreases in drift rate  
631 (with increasing task difficulty) were associated with a lowering of the decision threshold (Fig. S5DHL),  
632 thereby together accounting for the finding of largely constant median RTs. In other words, although the  
633 behavioral phenotype of nearly constant RTs across task difficulty levels is seemingly similar to snapshot  
634 sampling in rodent odor discrimination, the visual discrimination tasks studied here are more closely  
635 aligned with classic integration-to-threshold perceptual decision-making tasks, but with integration just  
636 occurring on much shorter timescale (temporal integration window = 300 ms)[56, 57].

637

### 638 **Conditional accuracy analysis**

639 The conditional accuracy function (CAF; [18-21]) links the two commonly used metrics of behavioral  
640 performance, namely, accuracy and reaction time. It represents the accuracy corresponding to each bin of  
641 the RT distribution (RTD). As a result, application of the conditional analysis can help decompose  
642 observed change in response accuracy following any experimental manipulation, into changes in the

643 CAF, in RTD, or both. For instance, we found that although manipulating stimulus size/contrast, stimulus  
644 duration, the visual context of target stimulus (through presentation of a foil), and pre-stimulus delay all  
645 cause changes in response accuracy, they do so via different routes. Manipulating stimulus size/contrast  
646 and presenting a foil mainly impact the sensory encoding regime of the CAF (via change in peak  
647 accuracy). Varying the stimulus duration involves changes in both the CAF and RTD. Adding a pre-  
648 stimulus delay, on the other hand, primarily changes the RTD. In addition, the specific pattern of change  
649 in CAF (i.e.,  $a_{\text{peak}}$ , and  $t_{\text{chance}}$ ) provided insights into various cognitive variables that might be affected by  
650 the experimental manipulation. This is discussed in the following sections.

651

### 652 **Speed-accuracy tradeoff**

653 The conditional accuracy analysis yielded insights into the timescale of visual integration of mice. Across  
654 tasks, we found that performance improved with RT for RTs under 500 ms. In other words, for mice, after  
655 300 ms of exposure to the visual stimulus (i.e., RT=500 ms; see Results and Fig. 7), sacrificing speed by  
656 sampling longer or deliberating more, did not yield additional perceptual benefits. Together with the  
657 estimate from drift diffusion modeling of a non-decisional time constant of ~200 ms, this revealed that the  
658 timescale of sensory/evidence integration was ~300 ms for mice in these visual tasks.

659

660 The conditional accuracy analysis also offered another window into the result of consistent RT (minimal  
661 RT change) across tasks. Since task manipulations did not change the time to peak accuracy ( $t_{\text{peak}}$ ), an  
662 optimal strategy would be to respond with RTs centered around  $t_{\text{peak}}$ : responding earlier than  $t_{\text{peak}}$   
663 sacrifices accuracy, while responding later than  $t_{\text{peak}}$  wastes time (reducing the number of trials and  
664 amount of potential reward within a session). Consistent with this expectation, the median RT was  
665 between 500 ms– 600 ms across tasks, suggesting that mice are operating close to the optimal point in the  
666 speed-accuracy tradeoff.

667

### 668 **VSTM: Mice vs. humans**

669 Different labels have been used for the time-dependent, labile internal representations of stimuli, such as  
670 iconic memory [32, 58], sensory storage [27, 59-61], perceptual memory [34], VSTM [30, 31], visual  
671 working memory (VWM, [25, 35, 38, 62]), visible persistence [33] and so on. The duration of VSTM in  
672 humans has been estimated to range from 250ms [63] to 1s [27] or even longer [29, 30], and may be  
673 depending on the demands placed on the subjects [32] and on the stimulus feature being tested [62]. Here,  
674 the combination of conditional accuracy analysis and drift diffusion modeling yielded quantitative  
675 insights into the VSTM of mice. We found that mouse conditional accuracy (in the context of grating  
676 orientation) gradually decayed after stimulus offset, with the decay starting at about 900ms after stimulus  
677 offset. The decay lasted till about 2100ms after stimulus offset, which yielded an estimate of 1700 ms  
678 (after subtracting fixed sensory + motor response delays), as the duration of the decaying trace of the  
679 stimulus or VSTM, paralleling the estimate from human studies [27, 29].

680

681 The duration of VSTM is not its sole limiting feature. The process that encodes information into the form  
682 of a VSTM trace is also limited in its capacity [64-70]. It has been shown that the VSTM trace is formed  
683 in humans within the first 200-300ms of stimulus presentation [22, 24-26]: masking the stimulus after  
684 that time does not impair human subjects' performance. In the previous section, we estimated that mice  
685 needed ~300 ms to fully encode a grating stimulus, similar in magnitude to the estimate from human  
686 studies.

687

688 An inverse relationship has been reported between the duration of stimulus and the duration of  
689 information persistence in VSTM after stimulus offset – shorter persistence for longer stimulus durations.  
690 We found that mice exhibited a trend for a similar effect in the single target orientation discrimination  
691 task. Thus, consistent with another recent report [71], our results establish quantitative parallels between  
692 many aspects of human and mouse visual perceptual performance.

693

694 The limited duration of VSTM also provided a plausible explanation for the observation that mice tended  
695 to respond faster when the stimulus was shorter (Fig.3B), even when the task did not require them to do  
696 so (the allowed response window was 3s irrespective of stimulus duration). Since the target information  
697 retained in VSTM starts to fade away after the stimulus offset, an optimal adaptation to briefly presented  
698 stimuli would be to respond sooner, thereby driving RT to be shorter. Consequently, the ‘time pressure’ to  
699 respond quickly before the VSTM trace of the target fades away is likely to drive the overall (median) RT  
700 to smaller values.

701

### 702 **Flanker and visual search tasks**

703 We examined mouse discrimination performance in tasks in which the target was presented together with  
704 a foil: in one case, the target always occurred at a fixed location, and in the other, target and foil positions  
705 were chosen randomly on any given trial. The former is a version of the classic flanker task in humans  
706 [43, 44], and the latter, a rudimentary version of the classic search task in humans [72, 73]. (Tasks of both  
707 kinds have been used to study selective spatial attention in humans, and we have recently shown the  
708 efficacy of the former for studying exogenous capture of spatial selective attention in mice [16]). In the  
709 search task, the target is identified both by its salience (higher contrast) and by its behavioral relevance  
710 (the learned rule that the higher contrast stimulus yields reward [74]). Thus, both exogenous as well as  
711 endogenous influences drive target ‘search’ and behavioral performance. Consistent with this  
712 interpretation, we find that the psychometric curve of performance cannot be explained simply by the  
713 varying target contrast: Direct comparison of the performance of paired target-foil presentation with  
714 single target presentation (of matched contrast) revealed a foil contrast-dependent performance  
715 impairment, consistent with it serving as a progressively more powerful distracter for the animal’s spatial  
716 attention [75-77].

717

### 718 **Stimulus onset delay and impulsivity**

719 Adding a delay before stimulus onset impaired mice’s performance. Specifically, the delayed onset of  
720 stimulus induced a greater proportion of premature responses (movement initiated before the stimulus was  
721 presented), with mice guessing more often. Nonetheless, our results revealed that mice were able to sense  
722 the delay and withhold their responses for a short period of time, but just not long enough to fully offset the  
723 delay. First, these results suggest that such inherent impulsivity may be countered against by further training,  
724 a conclusion supported from work in head-fixed mice in which they were trained to wait during a delay  
725 period [15], or withhold licks during a delay period [9]. Second, these results allowed the definition of a  
726 quantitative metric for impulsivity, one that depended on the animals withholding responses until  
727 information that determines which response to produce is available, rather than depending on withholding  
728 responses (after all the information is available) until a ‘go’ cue is presented, or on the ability to stop a  
729 response that is underway [13]. We called this metric the impulsivity index, and estimated it to be 0.6 for  
730 mice. It can be used readily to estimate and compare impulsivity across other animals.

731

732

## 733 **METHODS**

734

735 **Animals.** All mice were of the C57Bl6/J strain, and were purchased from the Jackson Laboratory. Upon  
736 arrival, mice were housed in a colony where temperature (~75F) and humidity (~55%) were controlled on  
737 a 12:12h light:dark cycle. Animals were allowed to acclimate for at least one week, with *ad libitum* access  
738 to food and water before water regulation was initiated. Experiments were all carried out in the light phase.  
739 All procedures followed the NIH guidelines and were approved by the Johns Hopkins University Animal  
740 Care and Use Committee (ACUC).

741

742 **Water regulation.** Mice were water-restricted following protocols described by Guo, Hires [78] with a few  
743 modifications described previously [16]. Briefly, mice were individually housed, and administered 1mL  
744 water per day to taper their body weight down, over the course of 5-7 days, to 80-85% of each animal's



745 free-feeding baseline weight. During behavioral training/testing, the primary source of water for mice was  
746 as a reinforcer for correct performance: 10  $\mu$ L of water was provided for every correct response.

747  
748 **Apparatus.** Behavioral training and testing were performed in soundproof operant chambers equipped with  
749 a touchscreen (Med Associates Inc.), a custom-built reward port (fluid well), infrared video cameras, a  
750 house light and a magazine light above the reward port. The reward port was located at the opposite wall  
751 of the chamber relative to the touchscreen (Fig. 1A). Two custom modifications were introduced that  
752 limited the area of the touchscreen available for exploration by the freely behaving mice, thereby  
753 minimizing false-alarm triggers due to accidental touches. First, mice were placed within a clear plexiglass  
754 tube that ran from the touchscreen to the reward port. The diameter of the tube (5 cm) was large enough to  
755 allow mice to run back and forth from the touchscreen to the reward port, to groom and to behave naturally.  
756 Second, a thin plexiglass mask (3 mm thickness) was placed 3 mm in front of the touchscreen with three  
757 apertures corresponding to the locations at which a mouse was allowed interact with the screen by a nose-  
758 touch (Fig. 1A). The apertures, each 1 cm in diameter, were drilled in the mask in an inverted triangle  
759 configuration: ‘left’ and ‘right’ apertures were placed 3cm apart (center-to-center) along the base of the  
760 triangle, and a ‘central’ aperture, at the apex of the triangle, was 1.5 cm below the midpoint of the base (Fig.  
761 1A). All experimental procedures were executed using control software (K-limbic, Med-Associates).

762  
763 **Visual stimuli.** Visual stimuli (bright objects on a dark background; background luminance = 1.32  $\text{cd}/\text{m}^2$ )  
764 were generated using MATLAB (Mathworks) and imported into the K-Limbic system as jpeg images. A  
765 small cross (60x60 pixels; luminance = 130  $\text{cd}/\text{m}^2$ ) was presented in the central aperture and had to be  
766 touched to initiate each trial. The experimental stimuli were oriented gratings (horizontal or vertical),  
767 generated using a square wave (24 pixels/cycle; within the range of spatial frequencies shown to be effective  
768 for mice [10]). The dark phase of the cycle was black (luminance,  $L_{\text{dark}} = 1.32 \text{ cd}/\text{m}^2$ ; same as the  
769 background), and the bright phase was varied between 1.73  $\text{cd}/\text{m}^2$  and 130  $\text{cd}/\text{m}^2$  depending on the tasks  
770 (see below). The contrast of each grating stimulus was calculated as the ratio of luminance of its bright  
771 phase ( $L_{\text{bright}}$ ) over its minimal luminance (i.e., dark phase); contrast =  $L_{\text{bright}}/L_{\text{dark}}$ . The size of the stimulus  
772 was also varied depending on the task, ranging from 60 pixels x 60 pixels to 156 pixels x 156 pixels, which  
773 subtended 25-65 visual degrees at a viewing distance of 2 cm from the screen.

774  
775 **Experimental procedure and behavioral training.** Each mouse was run for one 30 min behavioral session  
776 per day, with each session yielding 80-180 trials. Each behavioral session began with a 10 sec acclimation  
777 period, during which mice were allowed to explore the environment with the lights on and to retrieve a  
778 bolus (10  $\mu$ L) of ‘free’ water at the reward port. Following this, lights were shut off and the zeroing cross  
779 to start the first trial appeared on the screen. The cross flashed once every 10 sec until touched, and the  
780 flash was accompanied by a short beep of 600 Hz for 30 ms, to induce the mouse to approach and begin the  
781 trial. Upon trial initiation, the cross vanished, and the visual stimulus (or stimuli) were immediately  
782 presented (typically, but see stimulus onset delay task below), for a duration of 0.1-3s depending on the  
783 task (see below).

784 Mice were trained to report the information contained in the target grating, namely, its orientation, by  
785 nose-touching within the correct response aperture (vertical target grating  $\rightarrow$  nose-touch in left response  
786 aperture; horizontal target grating  $\rightarrow$  nose-touch in right response aperture). A correct response triggered a  
787 tone (600 Hz, 1 sec), the turning on of the magazine light above the reward port, and the delivery of 10  
788 microliters of water at the reward port. Mice turned away from the screen, ran to the liquid well, consumed  
789 the reward, and ran back to face the touchscreen in order to begin the next trial. Mouse head entry into the  
790 reward port was detected by an infrared sensor which caused the magazine light to turn off, and the zeroing  
791 cross (for the next trial) to be presented on the touchscreen. An incorrect response triggered the turning on  
792 of both the house light and the magazine light for 5-s as a timeout; the next trial could not be initiated until  
793 the end of timeout. A failure to respond within 3s of stimulus presentation resulted in a reset: the stimulus  
794 vanished and the zeroing cross was presented immediately (without a timeout penalty), to allow initiation



795 of the next trial. Well-trained animals failed to respond on fewer than 5% of the total number of trials, and  
796 there were no systematic differences in the proportion of such missed trials between different conditions.

797 Within each daily 30-minute behavioral session, mice consumed approximately 1mL of water. If a mouse  
798 failed to collect enough water from the behavioral session, they were provided with a water supplement  
799 using a small plastic dish in their home cage. The specific amount of supplement was customized depending  
800 on each individual animal's body weight, the training phase it was in, and the motivational drive observed  
801 during the experiment.

802  
803 **Single-stimulus discrimination task.** Upon trial initiation, a single grating stimulus (i.e., the ‘target’) was  
804 presented above the central aperture, at the same horizontal level as the left and right apertures. The stimulus  
805 was presented typically immediately after the nose touch (delay = 0 ms), and mice were required to report  
806 its orientation with the appropriate nose-touch (Fig. 1B).

807 When stimulus size and contrast were manipulated (Fig. 1 and Fig. 2), the spatial frequency of the grating  
808 was fixed at 24 pixels/cycle, and three different sizes were tested: 60 x 60, 84 x 84, 108 x 108 (pixels x  
809 pixels). Seven different levels of contrast were tested in each case:  $\text{luminance}_{\text{bright}}/\text{luminance}_{\text{dark}} = 1.5, 2.0,$   
810  $3.3, 5.7, 12, 26, 99$ . Trials with different stimulus contrasts at a particular size were interleaved randomly  
811 throughout a session, while trials with different stimulus sizes were examined on different days. Data were  
812 recorded from a total of 18 sessions (days).

813 When stimulus size was manipulated independently (Fig.S1F-H), the spatial frequency and contrast of  
814 the grating were fixed, respectively, at 24 pixels/cycle and full contrast (99). Five different grating sizes  
815 were tested: 60 x 60, 84 x 84, 108 x 108, 132 x 132, 156 x 156 (pixels x pixels). Trials with different  
816 stimulus sizes were interleaved randomly throughout a session, and data were recorded from a total of five  
817 sessions (days).

818 When the stimulus duration was manipulated (Fig. 3), the spatial frequency, contrast, and size of the  
819 grating were fixed, respectively, at 24 pixels/cycle, full contrast (99), and 60 x 60 pixels x pixels. Eleven  
820 different stimulus durations were tested: 100, 200, 300, 400, 500, 600, 800, 1000, 1500, 2000, 3000 ms.  
821 The stimulus duration was fixed for a given day, and across days, was varied in a descending sequence over  
822 the range (from 3000 ms to 100 ms). Data were recorded from a total of 21 sessions.

823 When the stimulus onset delay, i.e., time difference between trial initiation and stimulus presentation,  
824 was manipulated (Fig. 6), the spatial frequency, contrast, size, and duration of the grating were fixed,  
825 respectively, at 24 pixels/cycle, full contrast (99), 60 x 60 pixels x pixels, and 600 ms. Three different delays  
826 were tested: 0, 100, and 200 ms. The delay duration was fixed for a given day, and varied in an ascending  
827 sequence over the range (from 0 ms to 200 ms). Data were recorded from a total of 7 sessions (days).

828  
829 **Flanker task.** Upon trial initiation, either one stimulus (‘target’, 60 x 60 pixels, 2.5 cycle, 1s, contrast =  
830 15.2) was presented at the lower location, or two stimuli were presented simultaneously, with the target at  
831 the lower location and a second ‘flanker’ at the upper location (Fig.4A). Flankers were of the same size and  
832 spatial frequency as the target, but of contrast in 8 different levels: 1.3, 1.7, 2.4, 3.8, 6.8, 15, 33, 99. The  
833 orientation of the flanker was either identical to that of the target (‘congruent trial’) or orthogonal to that of  
834 the target (‘incongruent trial’). The stimulus (stimuli) was (were) presented for a duration of 1s, and mice  
835 were required to report orientation of the target grating with the appropriate nose-touch. All types of trials  
836 (no flanker, congruent, incongruent) and flanker contrasts were interleaved randomly within each daily  
837 session. To train mice on this flanker task, they were first trained on the single stimulus discrimination task  
838 (with the target always at the lower location), following which, a flanker was introduced at the upper  
839 location with progressively increasing contrast over training days. Data from this experiment have been  
840 reported previously [16]. Those same data from the flanker task were re-analyzed here using different  
841 analyses, after collapsing trials across all the contrasts of the flanker.

842  
843 **Visual search task.** Upon trial initiation, either one or two gratings were presented simultaneously (size=  
844 60 x 60 pixels; duration = 3 s, delay = 0 ms; Fig.5A). When only one grating was presented (i.e., single  
845 target trial), it was presented above the central aperture, at the same horizontal level as the left and right

846 apertures, and mice were rewarded for reporting the orientation of the target as in the single discrimination  
847 task. When two gratings were presented simultaneously (i.e., search trial), one was presented just above the  
848 central aperture (center of grating was 30 pixels or 12.5° above the center of the central aperture; ‘lower’  
849 location), and the other was presented far above the central aperture (center of the grating was 90 pixels or  
850 37.5° above the center of the central aperture; ‘upper’ location). The orientations of the two gratings were  
851 always orthogonal to each other, their contrasts were always different from each other, and their relative  
852 contrast was systematically varied (Fig.5A). Mice were rewarded for reporting the orientation of the grating  
853 with higher contrast (i.e., ‘target’), following the same rule as in the single stimulus conditions: vertical →  
854 nose touch to the left; horizontal → nose touch to the right. The target could appear at the upper or lower  
855 location (in a randomized fashion). Selection trials were interleaved with single target trials randomly  
856 throughout a session, and a total of 7 sessions (days) were recorded.

857  
858 **Subject inclusion/exclusion.** A total of 33 mice were used. All 33 were trained on the single stimulus  
859 discrimination task, and of them, 8 mice never passed the inclusion threshold of % correct >70%. Of the  
860 remaining 25 mice, different subsets of mice were used to explore the limits of visual discrimination, and  
861 to study target selection. In general, for each task on which mice were trained (including the flanker and  
862 search tasks), they were considered to have learned the task if the overall performance (across all trial types)  
863 was > 70%. In the regular version of the search task (Fig. 5), all mice achieved this criterion. However, for  
864 the more challenging version of the search task (Fig. S3HI), only 2 /7 mice achieved this criterion.

865 For mice involved in more than one experiment, they were well rested for 3-8 weeks with food and  
866 water *ad libitum* between experiments. Before the start of each experiment, all mice were given a few days  
867 of practice session to ensure that they remembered/re-learned the association between the orientation of  
868 single target and the appropriate response aperture within which to nose-touch. Mice used in visual search  
869 task were never used in the flanker task (and vice versa) since the two tasks involve different responding  
870 rules when two stimuli were presented simultaneously. In both the flaker and search tasks, we  
871

872 **Behavioral measurements:** Response accuracy (% correct) was calculated as the number of correct trials  
873 divided by the total number of trials responded (correct plus incorrect). Reaction time (RT) was defined as  
874 the time between the start of stimulus presentation and response nose-touch, both detected by the  
875 touchscreen. Only in the case of the experiment involving stimulus onset delays (Fig. 6), another kind of  
876 ‘reaction time’ was measured for comparison. Denoted ‘RT-start’, this was the time of the response nose-  
877 touch calculated from the start of the trial, as opposed to from stimulus onset.

878  
879 **Conditional accuracy analysis.** In order to get the full distribution of RT, trials from all mice were pooled  
880 together and treated as if they were from one single mouse. Pooled trials were then sorted by their RT, and  
881 then binned by RT into 100 ms or 200 ms bins, depending on the total number of trials available in each  
882 experiment. Conditional accuracy was calculated as the number of correct trials divided by the total number  
883 of trials for each RT bin.

884  
885 **Conditional accuracy function (CAF).** To quantitatively describe the relationship between the conditional  
886 accuracy and RT, we fitted the plot of discrimination accuracy against (binned) RT with different functions  
887 (the CAF, see below) using a nonlinear least square method.

888 For RT bins aligned to stimulus onset (Fig. 2, 4C, S3, S4D), we fit the data using an asymptotic  
889 function:  $\text{accuracy} = \lambda (1 - e^{-\gamma_{enc} (RT - \delta)})$ . Three key metrics were defined for the sensory encoding phase  
890 for the use in subsequent comparisons between trial conditions: (1) peak conditional accuracy ( $a_{peak}$ ), the  
891 maximal level of accuracy that the CAF reaches within the range of RT; (2) the timepoint at which the  
892 conditional accuracy reaches its maximal ( $t_{peak}$ ). We defined it as the time point when the ascending CAF  
893 reaches  $a_{peak} * 0.95$ ; and (3) the timepoint at which the conditional accuracy just exceeds chance level of  
894 performance ( $t_{50}$ ). We defined it as the time point when the ascending CAF crosses 52.5% (i.e.,  
895  $50% * 1.05$ ). Note that  $t_{peak}$  and  $t_{50}$  are influenced by the slope parameter,  $\gamma_{enc}$ , and the temporal offset at  
896 chance performance,  $\delta$ . Across different tasks, the parameter that was most commonly associated with

897 changes in the sensory encoding regime was  $a_{\text{peak}}$ ;  $t_{\text{peak}}$  and  $t_{50}$  were largely unchanged by stimulus and  
898 task manipulations. It is possible that the lack of significant effects on  $t_{\text{peak}}$  and  $t_{50}$  was due to the very  
899 small proportion of trials with <300 ms RT across tasks (e.g., 2.4% in Fig. 2A), which resulted in higher  
900 variability in the estimates of  $t_{50}$  and  $t_{\text{peak}}$ .

901  
902 For RT bins aligned to stimulus offset (Fig. 3, 4E, S4F), we fit the data using a sigmoid function:  
903  $\text{accuracy} = \lambda [1/(1 + e^{-\beta_{\text{dec}}(RT - \tau)})] + 50$  to quantify the time course of performance decay. Two key metrics  
904 were defined for this VSTM phase for the use in subsequent comparisons between trial conditions: (1) the  
905 first time point at which the conditional accuracy drops from its maximum ( $t_{\text{decay}}$ ). We defined it as the  
906 time point when the descending CAF crosses  $a_{\text{peak}} * 0.95$ ; and (2) the first timepoint at which the  
907 conditional accuracy drops to a level indistinguishable from the chance ( $t_{\text{chance}}$ ). We defined it as the  
908 timepoint when the descending CAF crosses 52.5%. In (rare) cases when the CAF never went below  
909 52.5%,  $t_{\text{chance}}$  was set to be 3000ms. Note that  $t_{\text{decay}}$  and  $t_{\text{chance}}$  are influenced by the slope parameter,  $\beta_{\text{dec}}$ , and  $\tau$ .

910 The confidence interval of the CAF and each metric were estimated by bootstrapping: the same number  
911 of trials were resampled from the raw data randomly with replacement, and were then processed  
912 following the same steps as described above to get repeated estimates of the CAF and corresponding  
913 metrics. Such resampling was repeated 1000 times to estimate the dispersion of each metric. Plots of the  
914 estimated value of each metric show the mean +/- std of the bootstrapped distribution of estimates  
915 (Fig. 2C, 3E, 4DF, S5EG, S6EG).

916 **Signal detection analysis (sensitivity and criterion).** In the framework of signal detection theory, we  
917 assigned the correct vertical trials as ‘hits’, incorrect vertical trials as ‘misses’, correct horizontal trials as  
918 ‘correct rejections’ and incorrect horizontal trials as ‘false alarms’, and calculated the perceptual sensitivity  
919 ( $d'$ ) and criterion ( $c$ ) accordingly [79] (Fig. S1B). Because of the inherent symmetry in 2-AFC tasks, this  
920 calculation was independent of which grating orientation – vertical or horizontal – was assigned as ‘signal’  
921 and which as ‘noise’. Consequently, a positive value of  $c$  caused poor performance just as much as the  
922 corresponding negative value, and therefore, we quantified the absolute value of  $c$  ( $|c|$ ) as the relevant metric  
923 of decision criterion.

924  
925 **Trial inclusion/exclusion.** Mice were observed to become less engaged in the task towards the end of a  
926 behavioral session, when they had received a sizeable proportion of their daily water intake. This was  
927 reflected in their behavioral metrics: they tended to wait longer to initiate the next trial, and their  
928 performance deteriorated. We identified and excluded such trials following a previously published,  
929 objective procedure [16], in order to minimize confounds arising from loss of motivation towards the end  
930 of sessions. Briefly, we pooled data across all mice and all sessions, treating them as coming from one  
931 session of a single ‘mouse’. We then binned the data by trial number within the session, computed the  
932 discrimination performance in each bin (% correct), and plotted it as a function of trial number within  
933 session (Fig. S1EH, S2C, S3C, S4C). Using a bootstrapping approach, we computed the 95% confidence  
934 interval for this value. We used the following exclusion criterion: Trials  $q$  and above were dropped if the  
935  $q^{\text{th}}$  trial was the first trial at which *at least one* of the following two conditions was satisfied: (a) the  
936 performance was statistically indistinguishable from chance on the  $q^{\text{th}}$  trial and for the majority (3/5) of the  
937 next 5 trials (including the  $q^{\text{th}}$ ), (b) the number of observations in  $q^{\text{th}}$  trial was below 25% of the maximum  
938 possible number of observations for each trial (mice\*sessions), thereby signaling substantially reduced  
939 statistical power available to reliably compare performance to chance. The plots of performance as a  
940 function of trial number, and number of observations as a function of trial number for the different tasks in  
941 this study are shown in Figs. S1EH, S2C, S3C, S4C, along with the identified cut-off trial numbers ( $q$ ).

942  
943 **Drift diffusion modeling of RT distributions.** To shed light on potential mechanisms underlying observed  
944 RT distributions, we applied the drift-diffusion model to our RT data [48]. This model hypothesizes that a  
945 subject (‘decision maker’) collects information from the sensory stimulus via sequential sampling, causing  
946 sensory evidence to accrue for or against a particular option (usually binary) during the viewing of the  
947 stimulus. A decision is said to be made when the accumulating evidence reaches an (abstract) internal

948 threshold of the subject. This process of evidence accumulation, together with the processes of sensory  
949 encoding and motor execution, as well as threshold crossing, are said to determine the RT observed on each  
950 trial.

951 We used a standard version of the model that consists of four independent variables [45-47]: (1) the drift  
952 rate, (2) the boundary separation, (3) the starting point, and a (4) non-decisional constant, which accounts  
953 for the time spent in sensory encoding and motor execution. In the case of our tasks, there was no reason  
954 for the drift rate to be different between vertical versus horizontal gratings, and therefore, we merged both  
955 type of trials (trials with a horizontal target grating and trials with a vertical target grating). We treated  
956 'correct' response and 'incorrect' response as the two binary options, and fit the diffusion model to the RT  
957 distributions of correct versus incorrect trials using the fast-dm-30 toolbox with the maximum likelihood  
958 option to gain estimates of those four parameters for each individual mouse [48].

959 For accurate parameter estimates, trials with outlier values of RTs (too fast or too slow trials) are typically  
960 excluded [48]. We identified inordinately fast or slow trials using a previously published procedure [16].  
961 Briefly, for trials with RTs that are so short as to not allow mice sufficient time to accumulate sensory  
962 evidence, performance would be consistently poor because mice would be forced to guess. Similarly, on  
963 trials with RTs that are so long (far exceeding stimulus offset) as to extinguish the trace of sensory evidence  
964 from their short-term memory [35, 46, 80], performance would be consistently poor because animals would  
965 be forced to guess. From pooled RT data across all mice and all sessions that was binned in 50 ms bins, we  
966 calculated the response accuracy and the 95% confidence intervals (using a bootstrapping method) for each  
967 bin. Using this, we identified short and long RT bins for which the response accuracy was statistically  
968 indistinguishable from chance and excluded them from the analysis.

969  
970

971 **Statistical tests:** All analyses and statistical tests were performed in MATLAB. For single-stimulus  
972 experiments in which only one stimulus parameter was systemically varied, one-way ANOVA was applied  
973 to examine the effect of the manipulating the single factor (duration and delay, Fig. 3AB, 5C, 6, 7C, S1FG,  
974 S2AB, S3A, S4AB, S5I-K). For experiments that involved changing both stimulus size and contrast  
975 (Fig.1CD, 7A, S1CD, S5A-C) or changing both flanker congruency and contrast (Fig. 7B, S5E-G), two-  
976 way ANOVA was applied to examine the effect of each factor, as well as their interaction.

977 For the flanker task, the *Wilcoxon signed-rank test* was used to examine if the group performance in each  
978 trial type was different from chance, and also if there was difference between trial types (Fig.4B).

979 For the visual search task, the *Wilcoxon signed-rank test* was used to examine if the group performance  
980 in each trial type was different from chance, and also if there was difference between trial types (Fig.5B).  
981 One-way ANOVA was used to examine the effect of relative contrast (target/foil; Fig.5C). For comparisons  
982 between single-stimulus trials and selection trials (Fig.5D), the signed-rank test was used when single-  
983 stimulus were being compared to selection trials (with just one foil contrast), and the Kruskal-Wallis test  
984 was used when trials from more than one foil contrast were being compared.

985 Correction for multiple comparisons was performed where necessary using the Holm-Bonferroni test  
986 (HB test) for multiple comparisons.

987 The Pearson correlation coefficient and associated p-value were calculated for paired data (Fig. 2A, 3AB,  
988 6BD, S1G, S5DHL) using *corrcoef* function in MATLAB.

989 For the metrics associated with CAF, permutation tests were used to determine if the estimated values  
990 of each metric were different between experimental conditions (Fig.2CE, 3E, 4DF, S3EG, S4EG).  
991 Specifically, trials from both conditions were pooled together (unlabeled), and randomly re-assigned into  
992 two groups. The best-fit CAF and associated metrics were then calculated for each group, and so was the  
993 difference of metrics between groups. Following 1000 repetitions, the resulting distribution of the  
994 difference of metrics between groups was obtained under the null hypothesis that the data from the two  
995 conditions were indistinguishable (i.e., from the same distribution). The real, observed difference of  
996 metrics obtained from the best-fit CAF between two experimental conditions (for instance,  $\Delta a_{\text{peak}}$  from  
997 low-contrast vs. high contrast conditions) was compared against the null distribution to compute the



998 corresponding p-value. Such p-values were corrected for multiple comparisons using the Holm-  
999 Bonferroni correction when multiple pairs of conditions were compared (Fig. 2C).

1000

## 1001 SUPPLEMENTARY INFORMATION

1002 Supplementary figures (Fig. S1-S5) and legends are included below.

1003

## 1004 AUTHOR CONTRIBUTIONS

1005 SPM and WKY designed the research and wrote the paper. WKY performed the experiments, and analyzed  
1006 the data.

1007

1008

1009

## 1010 ACKNOWLEDGEMENTS

1011 This work was supported by funding from NIH R03 HD093995 and startup funds from Johns Hopkins  
1012 University. We thank James Garmon for help with fabrication of custom equipment.

1013

## 1014 COMPETING FINANCIAL INTERESTS

1015 The authors declare that there are no competing financial interests.

1016

## 1017 REFERENCES

- 1018 1. Huberman, A.D. and C.M. Niell, *What can mice tell us about how vision works?* Trends Neurosci, 2011.  
1019 **34**(9): p. 464-73.
- 1020 2. Glickfeld, L.L., R.C. Reid, and M.L. Andermann, *A mouse model of higher visual cortical function.*  
1021 *Current opinion in neurobiology*, 2014. **24**: p. 28-33.
- 1022 3. Seabrook, T.A., et al., *Architecture, function, and assembly of the mouse visual system.* Annual review of  
1023 neuroscience, 2017. **40**: p. 499-538.
- 1024 4. Burgess, C.P., et al., *High-Yield Methods for Accurate Two-Alternative Visual Psychophysics in Head-*  
1025 *Fixed Mice.* Cell Rep, 2017. **20**(10): p. 2513-2524.
- 1026 5. Marques, T., et al., *A Role for Mouse Primary Visual Cortex in Motion Perception.* Curr Biol, 2018.  
1027 **28**(11): p. 1703-1713.e6.
- 1028 6. Busse, L., et al., *The detection of visual contrast in the behaving mouse.* J Neurosci, 2011. **31**(31): p.  
1029 11351-61.
- 1030 7. Carandini, M. and A.K. Churchland, *Probing perceptual decisions in rodents.* Nature neuroscience, 2013.  
1031 **16**(7): p. 824.
- 1032 8. Glickfeld, L.L., M.H. Histed, and J.H. Maunsell, *Mouse primary visual cortex is used to detect both*  
1033 *orientation and contrast changes.* J Neurosci, 2013. **33**(50): p. 19416-22.
- 1034 9. Long, M., et al., *Contrast-dependent orientation discrimination in the mouse.* Sci Rep, 2015. **5**: p. 15830.
- 1035 10. Histed, M.H., L.A. Carvalho, and J.H. Maunsell, *Psychophysical measurement of contrast sensitivity in the*  
1036 *behaving mouse.* J Neurophysiol, 2012. **107**(3): p. 758-65.
- 1037 11. Prusky, G.T. and R.M. Douglas, *Characterization of mouse cortical spatial vision.* Vision Res, 2004.  
1038 **44**(28): p. 3411-8.
- 1039 12. Prusky, G.T., P.W. West, and R.M. Douglas, *Behavioral assessment of visual acuity in mice and rats.*  
1040 *Vision Res*, 2000. **40**(16): p. 2201-9.
- 1041 13. Dent, C.L. and A.R. Isles, *An overview of measuring impulsive behavior in mice.* Curr Protoc Mouse Biol,  
1042 2014. **4**(2): p. 35-45.
- 1043 14. Isles, A.R., et al., *Common genetic effects on variation in impulsivity and activity in mice.* J Neurosci, 2004.  
1044 **24**(30): p. 6733-40.
- 1045 15. Wang, L. and R.J. Krauzlis, *Visual Selective Attention in Mice.* Curr Biol, 2018. **28**(5): p. 676-685.e4.
- 1046 16. You, W.-K. and S.P. Mysore, *Endogenous and exogenous control of visuospatial selective attention in*  
1047 *freely behaving mice.* bioRxiv, 2019: p. 550822.
- 1048 17. Mar, A.C., et al., *The touchscreen operant platform for assessing executive function in rats and mice.* Nat  
1049 *Protoc*, 2013. **8**(10): p. 1985-2005.
- 1050 18. Wickelgren, W.A., *Speed-accuracy tradeoff and information processing dynamics.* Acta psychologica,  
1051 1977. **41**(1): p. 67-85.



- 1052 19. Luce, R.D., *Response times: Their role in inferring elementary mental organization*. 1986: Oxford  
1053 University Press on Demand.
- 1054 20. McElree, B. and B.A. Doshier, *Serial position and set size in short-term memory: the time course of*  
1055 *recognition*. Journal of Experimental Psychology: General, 1989. **118**(4): p. 346.
- 1056 21. Heitz, R.P., *The speed-accuracy tradeoff: history, physiology, methodology, and behavior*. Frontiers in  
1057 neuroscience, 2014. **8**: p. 150.
- 1058 22. Shibuya, H. and C. Bundesen, *Visual selection from multielement displays: measuring and modeling effects*  
1059 *of exposure duration*. Journal of Experimental Psychology: Human Perception and Performance, 1988.  
1060 **14**(4): p. 591.
- 1061 23. Watamaniuk, S.N. and R. Sekuler, *Temporal and spatial integration in dynamic random-dot stimuli*. Vision  
1062 research, 1992. **32**(12): p. 2341-2347.
- 1063 24. Busey, T.A. and G.R. Loftus, *Sensory and cognitive components of visual information acquisition*.  
1064 Psychological Review, 1994. **101**(3): p. 446.
- 1065 25. Vogel, E.K., G.F. Woodman, and S.J. Luck, *The time course of consolidation in visual working memory*.  
1066 Journal of Experimental Psychology: Human Perception and Performance, 2006. **32**(6): p. 1436.
- 1067 26. Bays, P.M., et al., *Temporal dynamics of encoding, storage, and reallocation of visual working memory*.  
1068 Journal of vision, 2011. **11**(10): p. 6-6.
- 1069 27. Sperling, G., *The information available in brief visual presentations*. Psychological monographs: General  
1070 and applied, 1960. **74**(11): p. 1.
- 1071 28. Averbach, E. and A.S. Coriell, *Short-term memory in vision*. The Bell System Technical Journal, 1961.  
1072 **40**(1): p. 309-328.
- 1073 29. Posner, M.I. and S.W. Keele, *Decay of visual information from a single letter*. Science, 1967. **158**(3797): p.  
1074 137-139.
- 1075 30. Phillips, W. and A. Baddeley, *Reaction time and short-term visual memory*. Psychonomic Science, 1971.  
1076 **22**(2): p. 73-74.
- 1077 31. Phillips, W., *On the distinction between sensory storage and short-term visual memory*. Perception &  
1078 Psychophysics, 1974. **16**(2): p. 283-290.
- 1079 32. Dick, A., *Iconic memory and its relation to perceptual processing and other memory mechanisms*.  
1080 Perception & Psychophysics, 1974. **16**(3): p. 575-596.
- 1081 33. Coltheart, M., *Iconic memory and visible persistence*. Perception & psychophysics, 1980. **27**(3): p. 183-  
1082 228.
- 1083 34. Magnussen, S. and M.W. Greenlee, *The psychophysics of perceptual memory*. Psychological research,  
1084 1999. **62**(2-3): p. 81-92.
- 1085 35. Smith, P.L. and R. Ratcliff, *An integrated theory of attention and decision making in visual signal*  
1086 *detection*. Psychol Rev, 2009. **116**(2): p. 283-317.
- 1087 36. Brown, J., *Some tests of the decay theory of immediate memory*. Quarterly Journal of Experimental  
1088 Psychology, 1958. **10**(1): p. 12-21.
- 1089 37. Gold, J.M., et al., *Visual memory decay is deterministic*. Psychological Science, 2005. **16**(10): p. 769-774.
- 1090 38. Zhang, W. and S.J. Luck, *Sudden death and gradual decay in visual working memory*. Psychological  
1091 science, 2009. **20**(4): p. 423-428.
- 1092 39. Barrouillet, P. and V. Camos, *As time goes by: Temporal constraints in working memory*. Current  
1093 Directions in Psychological Science, 2012. **21**(6): p. 413-419.
- 1094 40. Ricker, T.J., E. Vergauwe, and N. Cowan, *Decay theory of immediate memory: From Brown (1958) to*  
1095 *today (2014)*. The Quarterly Journal of Experimental Psychology, 2016. **69**(10): p. 1969-1995.
- 1096 41. Di Lollo, V., *Temporal characteristics of iconic memory*. Nature, 1977. **267**(5608): p. 241-243.
- 1097 42. Di Lollo, V., *Temporal integration in visual memory*. Journal of Experimental Psychology: General, 1980.  
1098 **109**(1): p. 75.
- 1099 43. Eriksen, B.A. and C.W. Eriksen, *Effects of noise letters upon the identification of a target letter in a*  
1100 *nonsearch task*. Perception & Psychophysics, 1974. **16**(1): p. 143-149.
- 1101 44. Fan, J., et al., *Testing the efficiency and independence of attentional networks*. J Cogn Neurosci, 2002.  
1102 **14**(3): p. 340-7.
- 1103 45. Ratcliff, R., *A theory of memory retrieval*. Psychological Review, 1978. **85**(2): p. 59-108.
- 1104 46. Ratcliff, R., et al., *Diffusion Decision Model: Current Issues and History*. Trends Cogn Sci, 2016. **20**(4): p.  
1105 260-281.
- 1106 47. Voss, A., M. Nagler, and V. Lerche, *Diffusion models in experimental psychology: a practical*  
1107 *introduction*. Exp Psychol, 2013. **60**(6): p. 385-402.

- 1108 48. Voss, A., J. Voss, and V. Lerche, *Assessing cognitive processes with diffusion model analyses: a tutorial*  
1109 *based on fast-dm-30*. Front Psychol, 2015. **6**: p. 336.
- 1110 49. Wong, A.A. and R.E. Brown, *Visual detection, pattern discrimination and visual acuity in 14 strains of*  
1111 *mice*. Genes Brain Behav, 2006. **5**(5): p. 389-403.
- 1112 50. Ohzawa, I., G. Sclar, and R.D. Freeman, *Contrast gain control in the cat visual cortex*. Nature, 1982.  
1113 **298**(5871): p. 266-8.
- 1114 51. Roitman, J.D. and M.N. Shadlen, *Response of neurons in the lateral intraparietal area during a combined*  
1115 *visual discrimination reaction time task*. Journal of neuroscience, 2002. **22**(21): p. 9475-9489.
- 1116 52. Zylberberg, A., C.R. Fetsch, and M.N. Shadlen, *The influence of evidence volatility on choice, reaction*  
1117 *time and confidence in a perceptual decision*. Elife, 2016. **5**: p. e17688.
- 1118 53. Uchida, N. and Z.F. Mainen, *Speed and accuracy of olfactory discrimination in the rat*. Nat Neurosci,  
1119 2003. **6**(11): p. 1224-9.
- 1120 54. Zariwala, H.A., et al., *The limits of deliberation in a perceptual decision task*. Neuron, 2013. **78**(2): p. 339-  
1121 51.
- 1122 55. Uchida, N., A. Kepecs, and Z.F. Mainen, *Seeing at a glance, smelling in a whiff: rapid forms of perceptual*  
1123 *decision making*. Nature Reviews Neuroscience, 2006. **7**(6): p. 485-491.
- 1124 56. Abraham, N.M., et al., *Maintaining accuracy at the expense of speed: stimulus similarity defines odor*  
1125 *discrimination time in mice*. Neuron, 2004. **44**(5): p. 865-876.
- 1126 57. Khan, R.M. and N. Sobel, *Neural processing at the speed of smell*. Neuron, 2004. **44**(5): p. 744-747.
- 1127 58. Neisser, U., *Cognitive psychology*. Cognitive psychology. 1967, East Norwalk, CT, US: Appleton-Century-  
1128 Crofts.
- 1129 59. Sperling, G., *A model for visual memory tasks*. Human factors, 1963. **5**(1): p. 19-31.
- 1130 60. Eriksen, C.W. and J.F. Collins, *Sensory traces versus the psychological moment in the temporal*  
1131 *organization of form*. Journal of Experimental Psychology, 1968. **77**(3p1): p. 376.
- 1132 61. Holding, D.H., *Sensory storage reconsidered*. Memory & Cognition, 1975. **3**(1): p. 31-41.
- 1133 62. Fougny, D. and G.A. Alvarez, *Object features fail independently in visual working memory: Evidence for*  
1134 *a probabilistic feature-store model*. Journal of vision, 2011. **11**(12): p. 3-3.
- 1135 63. Haber, R.N. and M. Hershenson, *The psychology of visual perception*. 1973: Holt, Rinehart & Winston.
- 1136 64. Potter, M.C., *Short-term conceptual memory for pictures*. Journal of Experimental Psychology: Human  
1137 Learning and Memory, 1976. **2**(5): p. 509-522.
- 1138 65. Raymond, J.E., K.L. Shapiro, and K.M. Arnell, *Temporary suppression of visual processing in an RSVP*  
1139 *task: An attentional blink?* Journal of experimental psychology: Human perception and performance, 1992.  
1140 **18**(3): p. 849.
- 1141 66. Duncan, J., R. Ward, and K. Shapiro, *Direct measurement of attentional dwell time in human vision*.  
1142 Nature, 1994. **369**(6478): p. 313-315.
- 1143 67. Chun, M.M. and M.C. Potter, *A two-stage model for multiple target detection in rapid serial visual*  
1144 *presentation*. Journal of Experimental Psychology: Human Perception and Performance, 1995. **21**(1): p.  
1145 109-127.
- 1146 68. Ward, R., J. Duncan, and K. Shapiro, *The slow time-course of visual attention*. Cognitive psychology,  
1147 1996. **30**(1): p. 79-109.
- 1148 69. Jolicoeur, P. and R. Dell'Acqua, *The demonstration of short-term consolidation*. Cognitive psychology,  
1149 1998. **36**(2): p. 138-202.
- 1150 70. Vogel, E.K., S.J. Luck, and K.L. Shapiro, *Electrophysiological evidence for a postperceptual locus of*  
1151 *suppression during the attentional blink*. Journal of Experimental Psychology: Human Perception and  
1152 Performance, 1998. **24**(6): p. 1656.
- 1153 71. Umino, Y., R. Pasquale, and E. Solessio, *Visual temporal contrast sensitivity in the behaving mouse shares*  
1154 *fundamental properties with human psychophysics*. eNeuro, 2018. **5**(4).
- 1155 72. Treisman, A. and S. Gormican, *Feature analysis in early vision: evidence from search asymmetries*.  
1156 Psychological review, 1988. **95**(1): p. 15.
- 1157 73. Wolfe, J.M., *Visual search*, in *Attention*. 1998, Psychology Press/Erlbaum (UK) Taylor & Francis: Hove,  
1158 England. p. 13-73.
- 1159 74. Yantis, S. and H.E. Egeth, *On the distinction between visual salience and stimulus-driven attentional*  
1160 *capture*. J Exp Psychol Hum Percept Perform, 1999. **25**(3): p. 661-76.
- 1161 75. Sridharan, D., et al., *Visuospatial selective attention in chickens*. Proc Natl Acad Sci U S A, 2014. **111**(19):  
1162 p. E2056-65.

- 1163 76. Chung, S.T., D.M. Levi, and G.E. Legge, *Spatial-frequency and contrast properties of crowding*. Vision  
1164 Res, 2001. **41**(14): p. 1833-50.
- 1165 77. Pelli, D.G., M. Palomares, and N.J. Majaj, *Crowding is unlike ordinary masking: distinguishing feature*  
1166 *integration from detection*. J Vis, 2004. **4**(12): p. 1136-69.
- 1167 78. Guo, Z.V., et al., *Procedures for behavioral experiments in head-fixed mice*. PLoS One, 2014. **9**(2): p.  
1168 e88678.
- 1169 79. Stanislaw, H. and N. Todorov, *Calculation of signal detection theory measures*. Behav Res Methods  
1170 Instrum Comput, 1999. **31**(1): p. 137-49.
- 1171 80. Ratcliff, R. and J.N. Rouder, *A diffusion model account of masking in two-choice letter identification*. J Exp  
1172 Psychol Hum Percept Perform, 2000. **26**(1): p. 127-40.
- 1173
- 1174

1175 **Supplementary Information**

1176

1177 **Visual psychophysics and limits of visual discrimination performance in freely**  
1178 **behaving mice**

1179

1180 **Wen-Kai You<sup>1,2</sup> and Shreesh P. Mysore<sup>1,2\*</sup>**

1181 <sup>1</sup>Department of Psychological and Brain Sciences, Johns Hopkins University

1182 <sup>2</sup>The Solomon H. Snyder Department of Neuroscience, Johns Hopkins University

1183 \*Corresponding author: [shreesh.mysore@jhu.edu](mailto:shreesh.mysore@jhu.edu)

1184



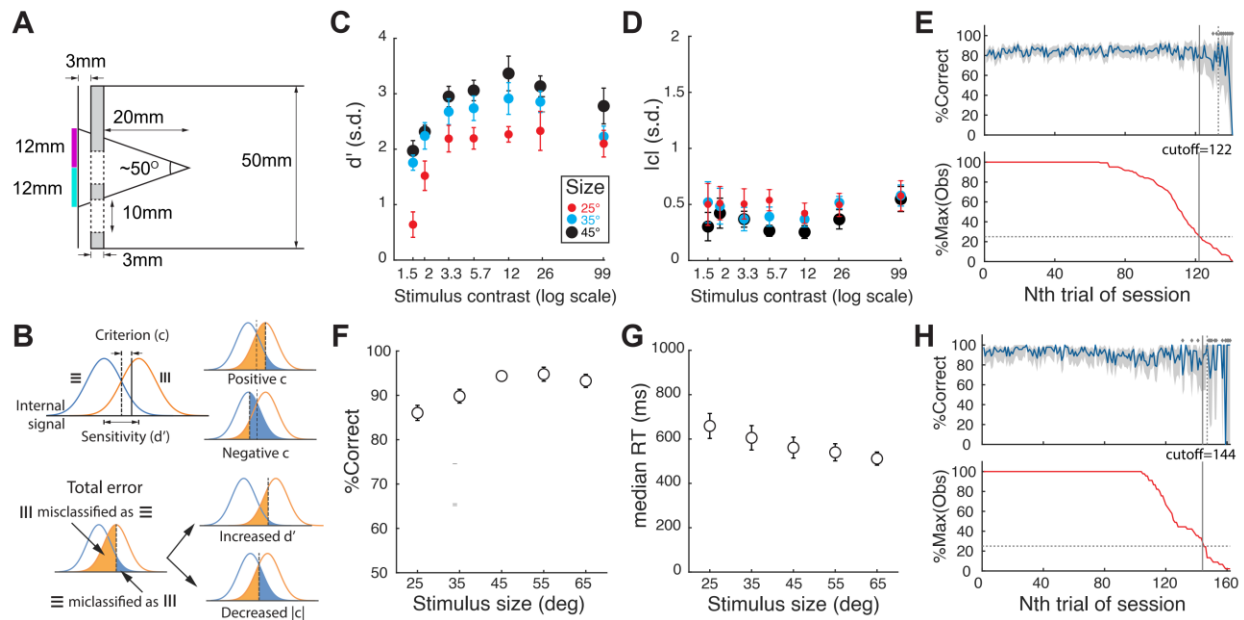

1185  
1186

1187 **Figure S1. Stimulus contrast and size modulate perceptual sensitivity but not decision criterion of orientation**  
1188 **discrimination performance.** (A) Lateral view of the schematic experimental setup showing the relative position of  
1189 the touchscreen (leftmost vertical line), the plexiglass mask (grey-filled vertical bar), and the tube within which mice  
1190 move (50 mm diameter); the plexiglass mask is positioned 3 mm in front of the touchscreen. Dashed lines indicate  
1191 the central response hole (lower dashed lines), and left/right response holes (upper dashed lines; 10 mm diameter).  
1192 For single-stimulus discrimination, the center of the stimulus is aligned with the center of left/right response holes in  
1193 elevation, and with the central hole in azimuth (see Fig. 1B). For experiments involving two stimulus locations (i.e.,  
1194 flanker task and search task), the upper (magenta) and lower (cyan) locations of the stimulus are indicated as colored  
1195 bars (see also Fig. 4A, 5A). The 60 pixels x 60 pixels (12mm x 12mm) stimulus subtends a visual angle of 25° when  
1196 viewed from 20 mm front of the plexiglass mask. (B) Schematic of the signal detection theory (SDT) analysis  
1197 illustrating perceptual sensitivity ( $d'$ ) and criterion ( $c$ ) calculations for 2-AFC task (Methods). Upper row, left: SDT  
1198 hypothesizes that the internal representation of vertical and horizontal stimuli can be reduced (projected) to a one-  
1199 dimensional decision axis, on which they form two overlapping distributions (due to noise). A decision is made  
1200 based on a criterion set by each individual animal: a stimulus whose representation falls above (or below) the  
1201 criterion is judged as vertical (or horizontal), producing the appropriate behavioral response. A decision criterion ( $c$ )  
1202 of 0, by definition, corresponds to optimal (unbiased) performance given the two distributions. For our 2-AFC task,  
1203 we defined the decision criterion as the amount of deviation from an unbiased value for the following reason. Upper  
1204 row, right: Because of the inherent symmetry of 2-AFC task design, positive criterion would increase errors in  
1205 classification of vertical targets, but also slightly decrease errors in classification of horizontal targets, producing a  
1206 net reduction in overall accuracy. Similarly, a negative criterion would increase errors in classification of horizontal  
1207 targets, but also slightly decrease errors in classification of vertical targets, again producing a net decrease in overall  
1208 accuracy. Therefore, when the two distributions are similar, a negative as well as a positive criterion of the same  
1209 magnitude will produce the same overall reduction in discrimination accuracy, but a criterion of smaller absolute  
1210 value would signal an overall improvement in performance. For this reason, we used the absolute value of  $c$  ( $|c|$ ) to  
1211 examine the effect of criterion change on response accuracy. Lower row: Based on theory, improved response  
1212 accuracy can result from (1) increased  $d'$ : when the two distributions become further separated; or (2) decreased  $|c|$ :  
1213 when the decision criterion becomes less biased. (C) Plot of perceptual sensitivity against stimulus contrast  
1214 (luminance<sub>Bright</sub>/luminance<sub>Dark</sub>; log scale; Methods). Different colors correspond to different dot sizes. Data: mean  $\pm$   
1215 s.e.m;  $n = 8$  mice. 2-way ANOVA,  $p < 0.001$  (contrast),  $p < 0.001$  (size),  $p = 0.899$  (interaction). (D) Plot of absolute  
1216 value of criterion  $|c|$  against stimulus contrast (log scale). Data: mean  $\pm$  s.e.m;  $n = 8$  mice. 2-way ANOVA,  $p = 0.374$   
1217 (contrast),  $p = 0.056$  (size),  $p = 0.998$  (interaction). (E) Identification of trials towards the end of the 30 min behavioral  
1218 sessions that corresponded to animals being poorly engaged in the task (Methods). Top panel: Time course of  
1219 overall response accuracy across mice as a function of trial number within sessions. Accuracy obtained from trials  
1220 pooled across all mice and sessions, and computed as a function of trial number within session (blue; Methods).  
1221 Grey shading: bootstrapped estimates of the 95% confidence interval of the accuracy (gray; Methods). Diamonds on

1222 top: trials whose accuracy not significantly different from chance. Dashed vertical line: first trial at which the  
1223 accuracy was not different from chance (50%), and stayed indistinguishable from chance for 3/5 of the next 5 trials  
1224 (Methods). Data show increased variability and worse performance towards the end of sessions. Bottom panel:  
1225 Number of actual observations across mice for each trial number, as a percentage of the maximal number of possible  
1226 observations ( $\Sigma$  mice\*sessions), plotted as a function of trial number within session (red). Solid vertical line: first  
1227 trial at which the number of observations drops below 25%. Data show drop in the number of observations available  
1228 to reliably assess performance towards the end of sessions. Based on these data, all trials above 122 of each  
1229 behavioral session of this experiment were dropped from analysis (Methods). Results in Fig. 1CD and S1CD are  
1230 based on data from trials 1-121 from each behavioral session. **(F-H)** Behavioral response metrics as a function of  
1231 stimulus size (n=9 mice). (F) Discrimination accuracy; p=0.001, 1-way ANOVA against stimulus size. (G) Median  
1232 RT; p=0.205, 1-way ANOVA against stimulus size. Data: mean  $\pm$  s.e.m; n= 9 mice. (H) Identification of trials  
1233 towards the end of the 30 min behavioral sessions that corresponded to animals being poorly engaged in the task  
1234 (Methods); conventions identical to those in E.  
1235  
1236

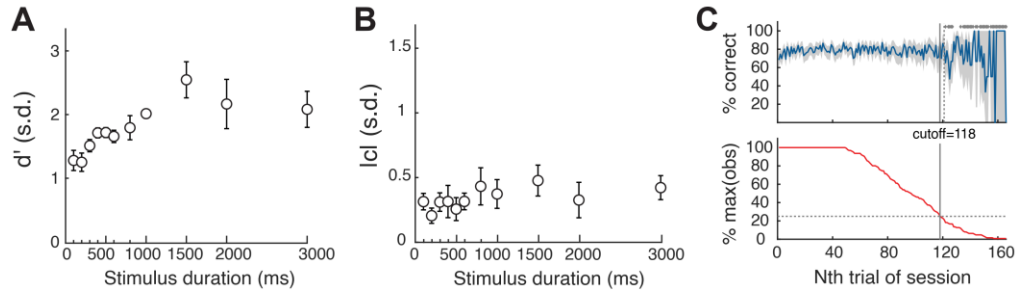

1237  
1238  
1239  
1240  
1241  
1242  
1243  
1244  
1245

**Figure S2. Stimulus duration modulates perceptual sensitivity but not decision criterion of orientation discrimination performance.** (A) Plot of perceptual sensitivity against stimulus duration. Data: mean  $\pm$  s.e.m; n= 6 mice. 1-way ANOVA,  $p=0.001$ . (B) Plot of absolute value of criterion  $|c|$  against stimulus duration. Data: mean  $\pm$  s.e.m; n= 6 mice. 1-way ANOVA,  $p=0.802$ . (C) Identification of trials towards the end of the 30 min behavioral sessions that corresponded to animals being poorly engaged in the task (Methods); conventions identical to those in Fig. S1E.

1246

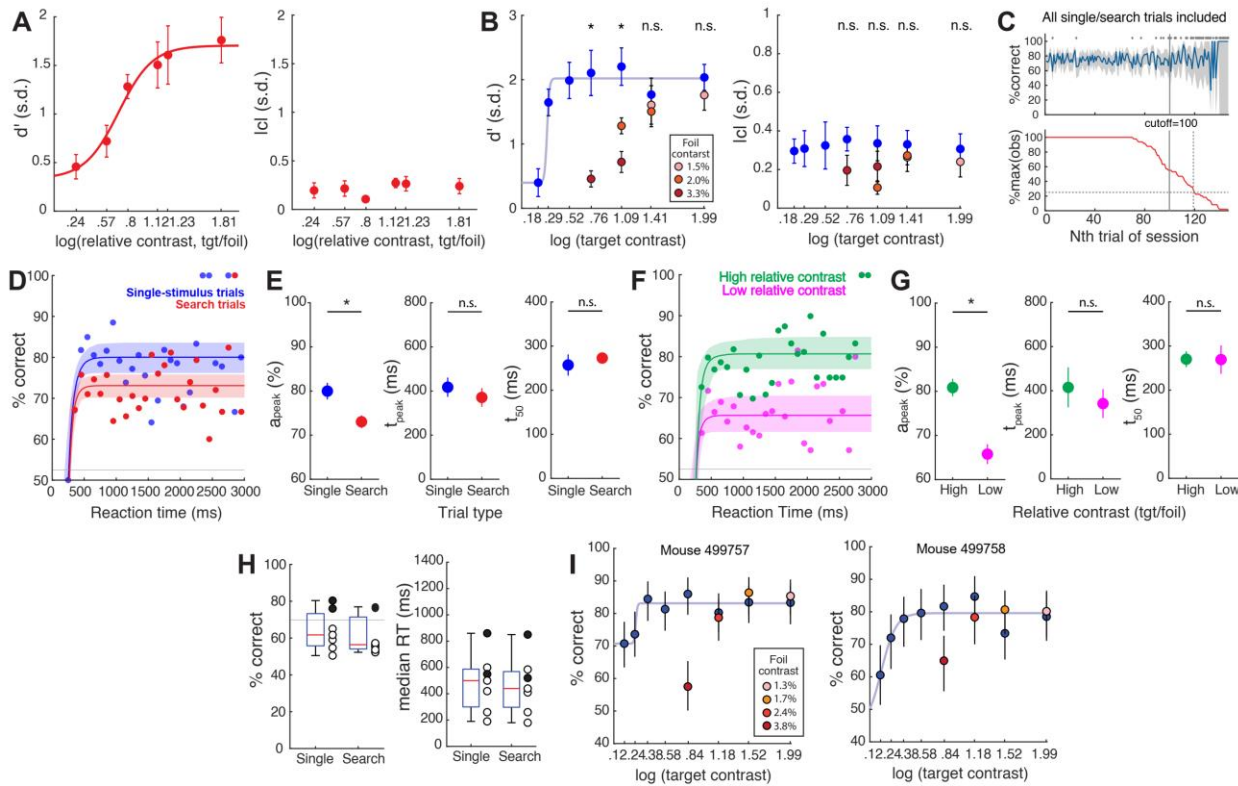

1247

1248

1249 **Figure S3. Foil modulates sensory encoding regime in rudimentary visual search task.** (A) Perceptual

1250 sensitivity ( $d'$ , left) and criterion ( $|c|$ , right) plotted against relative contrast of target:foil. Red curve: best sigmoidal

1251 fit (Methods). Left:  $p < 0.001$ , 1-way ANOVA. Right:  $p = 0.552$ , 1-way ANOVA. (B) Comparison of discrimination

1252 performance to target presented in the presence of foil (red data points) vs. when target was presented alone (blue

1253 data points). Left: Perceptual sensitivity ( $d'$ ). Right: criterion ( $|c|$ ). Shaded red: contrasts of foil. \* (n.s.):

1254  $p < 0.05$  ( $p > 0.05$ ), Kruskal-Wallis tests followed by HBMC correction (Methods). (C) Identification of trials towards

1255 the end of the 30 min behavioral sessions that corresponded to animals being poorly engaged in the task (Methods).

1256 All conventions are as in Fig. S1E. Based on these data, all trials above 100 of each behavioral session of this

1257 experiment were dropped from analysis. Results in Fig. 5 and S3 are based on data from trials 1-99 from each

1258 behavioral session. (D) CAFs for different trial types (blue: single-stimulus trials; red: search trials (Methods).

1259 (E) Plots of parameters of the CAF for different trial types. Single-stimulus vs. search trials:  $a_{\text{peak}}$ :  $p = 0.004$ ;  $t_{\text{peak}}$ :

1260  $p = 0.418$ ;  $t_{50}$ :  $p = 0.434$ , permutation tests (Methods). (F) CAFs for different relative contrast (target:foil) levels.

1261 Magenta: low relative contrast, first three relative contrast levels from Fig. 5C; Green: high relative contrast, the last

1262 three relative contrast levels from Fig. 5C (Methods). (G) Plots of parameters of the CAF for different relative

1263 contrast levels. High vs. low relative contrast:  $a_{\text{peak}}$ :  $p < 0.001$ ;  $t_{\text{peak}}$ :  $p = 0.349$ ;  $t_{50}$ :  $p = 0.944$ , permutation tests

1264 (Methods). (H-I) Performance of mice in the difficult version of search task (stimulus duration = 800 ms). (H) Left

1265 panel: response accuracy; right panel: median RT; data from trials pooled across all relative contrast conditions.

1266 Only two mice (filled black circles) passed the inclusion criterion with overall response accuracy  $> 70\%$ . (I)

1267 Performance of the two mice (left and right panels, respectively) that successfully learned the difficult version of the

1268 search task. Shown is the comparison of discrimination performance to target presented in the presence of foil (red

1269 data points) vs. when target was presented alone (blue data points) of those two mice in the advanced search task.

1270 The presence of foil reduces target discrimination accuracy in a contrast-dependent manner – a pattern

1271 similar/identical to that in Fig. 5D. Shaded red: contrasts of foil. Error bars: 95% C.I. estimated via bootstrapping.

1272



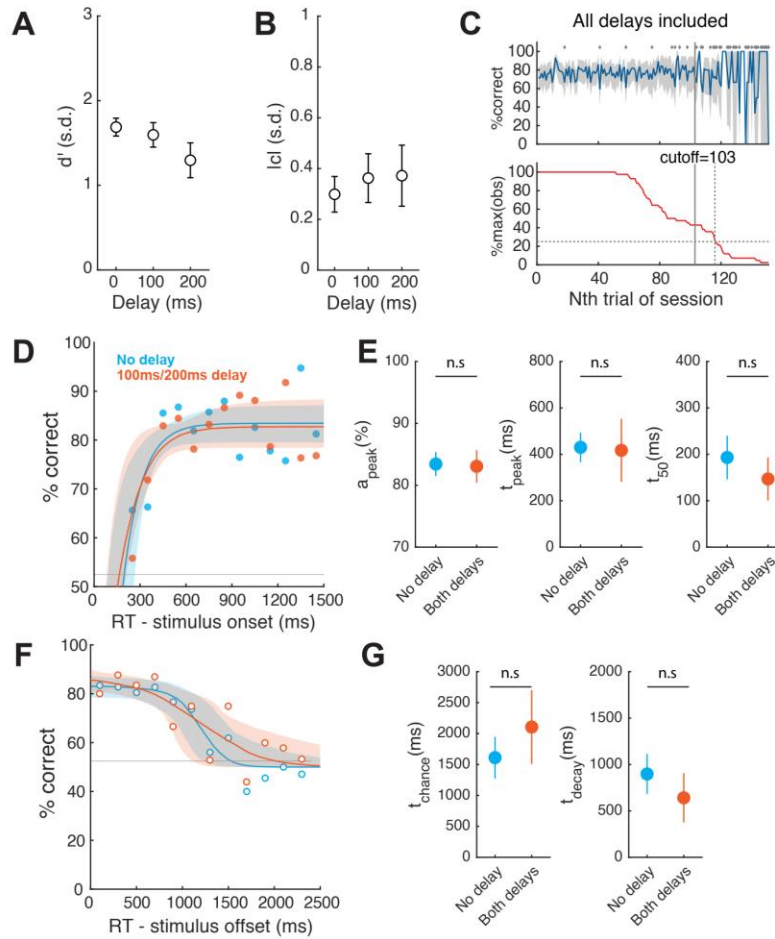

1273  
1274

1275 **Figure S4. Stimulus onset delay modulates neither the sensory encoding nor the VSTM regimes of the CAF.**

1276 (A) Plot of perceptual sensitivity ( $d'$ ) against stimulus delay;  $p=0.217$ , 1-way ANOVA. (B) Plot of criterion ( $|c|$ )  
1277 against stimulus delay;  $p=0.848$ , 1-way ANOVA. (C) Identification of trials towards the end of the 30 min  
1278 behavioral sessions that corresponded to animals being poorly engaged in the task (Methods). All conventions are as  
1279 in Fig. S1E. Based on these data, all trials above 103 of each behavioral session of this experiment were dropped  
1280 from analysis. Results in Fig. 6 and S4 are based on data from trials 1-102 from each behavioral session. (D) CAFs  
1281 of the sensory encoding stage, for targets of different stimulus onset delays; data correspond to trials with RT < 1500  
1282 ms. Blue: trials with no delay; orange: trials with 100 ms or 200 ms onset delays (Methods). (E) Plots of key  
1283 parameters of CAFs in D (sensory encoding regime) for different trial types. Data show mean  $\pm$  s.t.d of distribution  
1284 of bootstrapped estimates. Delay vs. no delay:  $a_{peak}$ :  $p=0.921$ ;  $t_{peak}$ :  $p=0.887$ ;  $t_{50}$ :  $p=0.105$ , permutation tests  
1285 (Methods). (F) CAFs of the VSTM-dependent stage, for targets of different stimulus onset delays; data correspond  
1286 to trials with RT > stimulus offset (600 ms), aligned to stimulus offset. Blue: no delay; orange: with 100 ms or 200  
1287 ms stimulus onset delay (Methods). (G) Plots of parameters of the CAF in F for different trial types. Delay vs. no  
1288 delay:  $t_{chance}$ :  $p=0.064$ ;  $t_{peak}$ :  $p=0.156$ , permutation tests (Methods).

1289

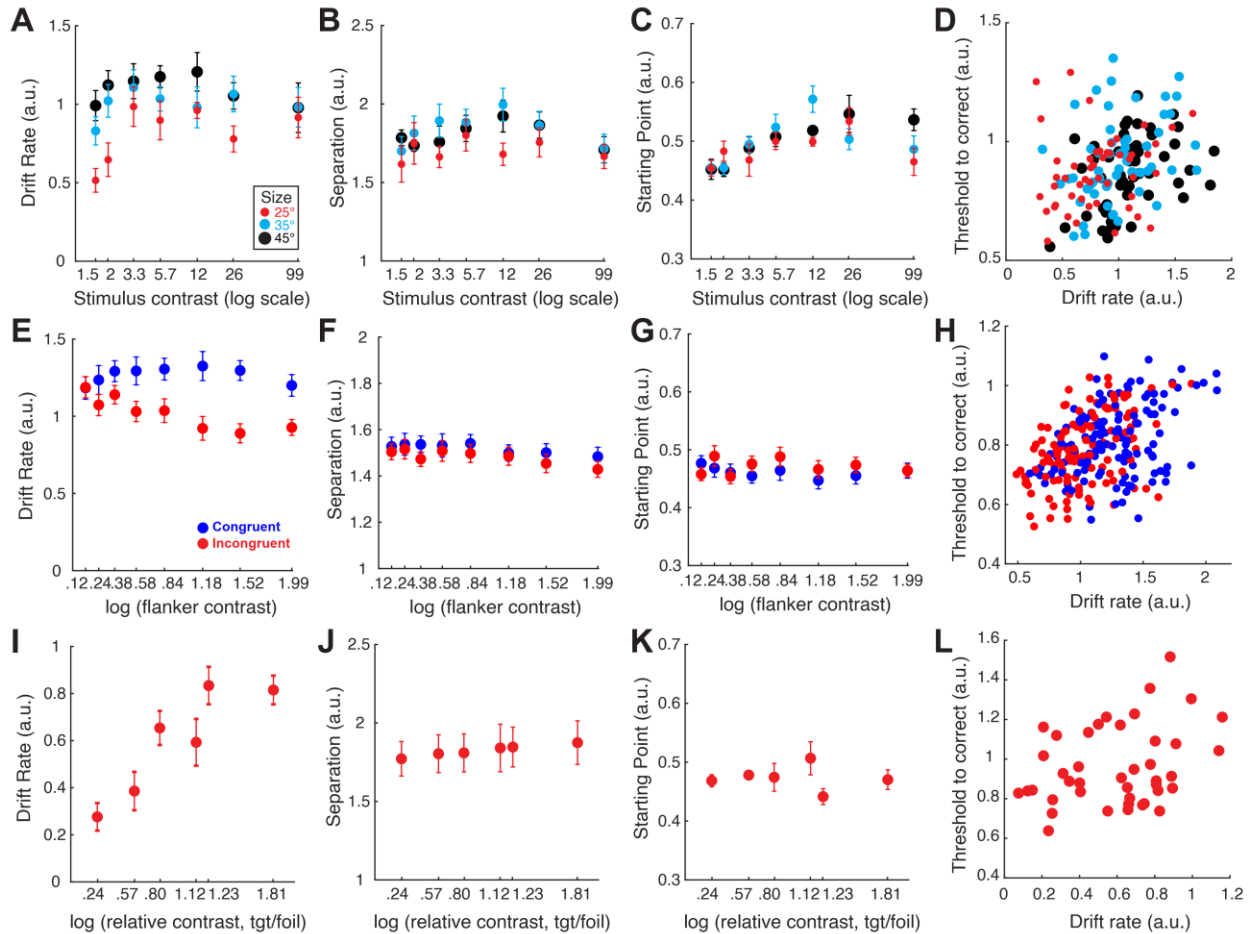

1290  
1291

1292

1293

1294

1295

1296

1297

1298

1299

1300

1301

1302

1303

1304

1305

1306

1307

**Figure S5. Estimates of parameters of the drift diffusion model applied to data from different tasks.**

(A-D) Single-stimulus discrimination task. Each model parameter plotted against stimulus size and contrast, as in Fig. 1. (A) drift rate: 2-way ANOVA,  $p=0.028$  (contrast),  $p<0.001$  (size),  $p=0.767$  (interaction); (B) boundary separation: 2-way ANOVA,  $p=0.171$  (contrast),  $p=0.026$  (size),  $p=0.953$  (interaction); (C) starting point: 2-way ANOVA,  $p<0.001$  (contrast),  $p=0.325$  (size),  $p=0.098$  (interaction). (D) Scatter plot of threshold to correct response versus drift rate; each dot is one individual mouse; colors as in A; Pearson's correlation = 0.3,  $p<0.001$ . (E-H) Flanker task. Each model parameter plotted against flanker congruency and contrast. (E) drift rate: 2-way ANOVA,  $p<0.001$  (flanker congruency),  $p=0.475$  (flanker contrast),  $p=0.097$  (interaction); (F) boundary separation: 2-way ANOVA,  $p=0.069$  (flanker congruency),  $p=0.617$  (flanker contrast),  $p=0.998$  (interaction); (G) starting point: 2-way ANOVA,  $p=0.173$  (flanker congruency),  $p=0.741$  (flanker contrast),  $p=0.724$  (interaction). (H) Scatter plot of threshold to correct response versus drift rate; each dot is one individual mouse; colors as in E; Pearson's correlation = 0.42,  $p<0.001$ . (I-L) Search task. Each model parameter plotted against the relative contrast of target:foil. (I) drift rate:  $p<0.001$ , 1-way ANOVA; (J) boundary separation:  $p=0.997$ , 1-way ANOVA; (K) starting point:  $p=0.275$ , 1-way ANOVA. (L) Scatter plot of threshold to correct response versus drift rate; each dot is one individual mouse; Pearson's correlation = 0.3,  $p=0.05$ .
